# Supplementary material for: The prognostic effect of cardiac rehabilitation in the era of acute revascularisation and statin therapy: A systematic review and meta-analysis of randomized and non-randomized studies – The Cardiac Rehabilitation Outcome Study (CROS)
Source: PubMed Central journal article supplement — Eur J Prev Cardiol. 2016 Oct 24;23(18):1914–39. doi: 10.1177/2047487316671181 (PMC5119625; doi:10.1177/2047487316671181), 2016-10-24
Supplement: Suppl.pdf [file Suppl.pdf]

**The prognostic effect of cardiac rehabilitation  
in the era of acute revascularization and statin therapy -  
a systematic review and meta-analysis of randomized and non-randomized studies.**

**The Cardiac Rehabilitation Outcome Study – CROS**

Bernhard Rauch <sup>1</sup>, Constantinos H Davos <sup>2</sup>, Patrick Doherty <sup>3</sup>, Daniel Saure <sup>4</sup>, Maria-Inti Metzendorf <sup>5</sup>,  
Annett Salzwedel <sup>6</sup>, Heinz Völler <sup>6</sup>, Katrin Jensen <sup>4</sup>, Jean-Paul Schmid <sup>7</sup> on behalf of the “Cardiac  
Rehabilitation Section”, European Association of Cardiovascular Prevention & Rehabilitation (EACPR),  
in cooperation with the Institute of Medical Biometry and Informatics (IMBI), Dept. of Medical  
Biometry, University of Heidelberg, and the Cochrane Metabolic and Endocrine Disorders Group,  
Institute of General Practice, Heinrich-Heine University, Düsseldorf, Germany

*PROSPERO registration number: CRD42014007084*

---

## **Supplemental material (SM)**

**Contents:**

|                                                                |         |
|----------------------------------------------------------------|---------|
| Affiliations                                                   | page 2  |
| Table SM 1: Search sources                                     | page 3  |
| Table SM 2: Excluded studies and justification for exclusion   | page 12 |
| Table SM 3: Study evaluation: Newcastle – Ottawa Scale (NOS)   | page 23 |
| Table SM 4: Sensitivity analyses                               | page 24 |
| Table SM 5: Checklist according to MOOSE and PRISMA statements | page 26 |
| References                                                     | page 28 |

## Affiliations

- <sup>1</sup> Institut für Herzinfarktforschung Ludwigshafen, Bremserstr. 79, D-67063 Ludwigshafen am Rhein, Germany
- <sup>2</sup> Cardiovascular Research Laboratory, Biomedical Research Foundation, Academy of Athens, 4 Soranou Ephessiou St., 115 27 Athens, Greece
- <sup>3</sup> Department of Health Sciences, Seebohm Rowntree Building, University of York, Heslington, York, YO10 5DD, UK
- <sup>4</sup> Institute of Medical Biometry and Informatics (IMBI), Marsilinius Arkaden, Im Neuenheimer Feld 130.3, University of Heidelberg, D-69120 Heidelberg, Germany
- <sup>5</sup> Cochrane Metabolic and Endocrine Disorders Group, Institute of General Practice, University of Düsseldorf, Moorenstr.5, Germany
- <sup>6</sup> University of Potsdam, Human Sciences Faculty, Am Neuen Palais 10, Haus 12, D-14469 Potsdam, Germany
- <sup>7</sup> Department of Cardiology Spital Tiefenau, Tiefenastrasse 112, 3004 Bern, Switzerland

### Address for correspondence:

Prof. Dr. Bernhard Rauch, Institut für Herzinfarktforschung Ludwigshafen, Bremserstr. 79, Haus M, D-67063 Ludwigshafen am Rhein, Germany; email: Rauch.B@t-online.de; phone +49-171-2109402; telefax +49-621-5032878

## Search sources

**Table SM 1: Search Sources**

**Medline (incl. PubMed):** Search interface: PubMed – Date of search: Dec 22<sup>nd</sup> 2015

#1

"Acute Coronary Syndrome"[mh] OR "Angina, Unstable"[mh] OR "Coronary Occlusion"[mh] OR "Coronary Thrombosis"[mh] OR "Myocardial Infarction"[mh] OR "Myocardial Revascularization"[mh] OR myocardial infarct\*[tiab] OR coronary infarct\*[tiab] OR cardiac infarct\*[tiab] OR heart infarct\*[tiab] OR postmyocardial infarct\*[tiab] OR "post-MI"[tiab] OR heart attack\*[tiab] OR coronary attack\*[tiab] OR cardiac attack\*[tiab] OR myocardial attack\*[tiab] OR cardiac event\*[tiab] OR coronary event\*[tiab] OR myocardial event\*[tiab] OR coronary syndrome\*[tiab] OR cardiac syndrome\*[tiab] OR myocardial syndrome\*[tiab] OR "bypass grafting"[tiab] OR "coronary artery bypass"[tiab] OR "coronary bypass"[tiab] OR "cardiac bypass"[tiab] OR coronary thromb\*[tiab] OR intracoronary thromb\*[tiab] OR coronary angioplast\*[tiab] OR intracoronary angioplast\*[tiab] OR cardiac angioplast\*[tiab] OR coronary stent\*[tiab] OR intracoronary stent\*[tiab] OR cardiac stent\*[tiab] OR coronary intervention\*[tiab] OR intracoronary intervention\*[tiab] OR cardiac intervention\*[tiab] OR coronary reperfusion\*[tiab] OR intracoronary reperfusion\*[tiab] OR cardiac reperfusion\*[tiab] OR myocardial revasculari\*[tiab] OR coronary revasculari\*[tiab] OR cardiac revasculari\*[tiab] OR "myocardial stunning"[tiab] OR "cardiac stunning"[tiab]

#2

"Rehabilitation"[mh] OR "Rehabilitation"[sh] OR "Rehabilitation Centers"[mh:noexp] OR "Secondary Prevention"[mh] OR rehabilitat\*[tiab] OR rehab[tiab] OR cardio-rehabilit\*[tiab] OR secondary prevent\*[tiab] OR program[tiab] OR programme[tiab] OR programs[tiab] OR programmes[tiab]

#3

#1 AND #2

#4

"cardiac rehabilitation"[tiab]

#5

#3 OR #4

#6

#3 OR #4 Filters: Publication date from 1995/01/01 to 2015/12/31

#7 [Cochrane HSSS filter]

(randomized controlled trial[pt] OR controlled clinical trial[pt] OR randomized[tiab] OR placebo[tiab] OR drug therapy[sh] OR randomly[tiab] OR trial[tiab] OR groups[tiab]) NOT (animals[mh] NOT humans[mh])

#8 [Own filter]

"cohort studies"[mh:noexp] OR "follow-up studies"[mh] OR "longitudinal studies"[mh] OR "prospective studies"[mh] OR cohort\*[tiab] OR prospectiv\*[tiab] OR longitudinal\*[tiab] OR follow-up\*[tiab] OR followup\*[tiab] OR "retrospective studies"[mh] OR retrospectiv\*[tiab]

#9

#7 OR #8

#10

#6 AND #9

#11

#10 AND medline[sb]

#12

#6 NOT medline[sb]

#13

#11 OR #12

#14

#13 NOT pmcbook

**Table SM 1: Search Sources (continued)****Embase**Search interface: Ovid SP – Date of search: Dec 22<sup>nd</sup> 2015 (Embase 1974 to 2015 Week 51)

#1

exp acute coronary syndrome/ or coronary artery thrombosis/ or exp percutaneous coronary intervention/ or exp unstable angina pectoris/ or exp heart infarction/ or exp coronary artery surgery/

#2

(myocardial infarct\* or coronary infarct\* or cardiac infarct\* or heart infarct\* or postmyocardial infarct\* or post-MI or heart attack\* or coronary attack\* or cardiac attack\* or cardiac event\* or coronary event\* or coronary syndrome or cardiac syndrome or bypass grafting or coronary artery bypass or coronary bypass or cardiac bypass or coronary thromb\* or intracoronary thromb\* or coronary angioplast\* or intracoronary angioplast\* or cardiac angioplast\* or coronary stent\* or intracoronary stent\* or cardiac stent\* or coronary intervention\* or intracoronary intervention\* or cardiac intervention\* or coronary reperfusion\* or intracoronary reperfusion\* or cardiac reperfusion\* or myocardial revasculari\* or coronary revasculari\* or cardiac revasculari\* or myocardial stunning or cardiac stunning).tw.

#3

1 or 2

#4

rehabilitation/ or heart rehabilitation/ or functional assessment/ or functional training/ or rehabilitation center/ or secondary prevention/

#5

(rehabilitat\* or rehab or cardiorehabilit\*).tw.

#6

4 or 5

#7

3 and 6

#8

"cardiac rehabilitation".tw.

#9

7 or 8

#10

limit 9 to yr=1995-Current

#11 [Wong 2006 Embase filter]

random\*.tw. or clinical trial\*.mp. or exp health care quality/

#12 [Own filter]

cohort analysis/ or longitudinal study/ or prospective study/ or follow up/ or retrospective study/ or (cohort\* or prospectiv\* or longitudinal\* or follow-up\* or followup\* or retrospectiv\*).tw.

#13

11 or 12

#14

10 and 13

| <b>Table SM 1: Search Sources (continued)</b>                                                    |                                                                                                                                                                                                                                                                                                                                                                                                                                                                                                                                                                                                                                                                                                                                                                                                                                                                                                                                                                                                                                             |
|--------------------------------------------------------------------------------------------------|---------------------------------------------------------------------------------------------------------------------------------------------------------------------------------------------------------------------------------------------------------------------------------------------------------------------------------------------------------------------------------------------------------------------------------------------------------------------------------------------------------------------------------------------------------------------------------------------------------------------------------------------------------------------------------------------------------------------------------------------------------------------------------------------------------------------------------------------------------------------------------------------------------------------------------------------------------------------------------------------------------------------------------------------|
| <b>Cochrane Central Register of Controlled Trials</b>                                            |                                                                                                                                                                                                                                                                                                                                                                                                                                                                                                                                                                                                                                                                                                                                                                                                                                                                                                                                                                                                                                             |
| Search interface: Cochrane Library – Date of search: Dec 22 <sup>nd</sup> (Issue 11 of 12, 2015) |                                                                                                                                                                                                                                                                                                                                                                                                                                                                                                                                                                                                                                                                                                                                                                                                                                                                                                                                                                                                                                             |
| #1                                                                                               | MeSH descriptor: [Acute Coronary Syndrome] explode all trees                                                                                                                                                                                                                                                                                                                                                                                                                                                                                                                                                                                                                                                                                                                                                                                                                                                                                                                                                                                |
| #2                                                                                               | MeSH descriptor: [Angina, Unstable] explode all trees                                                                                                                                                                                                                                                                                                                                                                                                                                                                                                                                                                                                                                                                                                                                                                                                                                                                                                                                                                                       |
| #3                                                                                               | MeSH descriptor: [Coronary Occlusion] explode all trees                                                                                                                                                                                                                                                                                                                                                                                                                                                                                                                                                                                                                                                                                                                                                                                                                                                                                                                                                                                     |
| #4                                                                                               | MeSH descriptor: [Coronary Thrombosis] explode all trees                                                                                                                                                                                                                                                                                                                                                                                                                                                                                                                                                                                                                                                                                                                                                                                                                                                                                                                                                                                    |
| #5                                                                                               | MeSH descriptor: [Myocardial Infarction] explode all trees                                                                                                                                                                                                                                                                                                                                                                                                                                                                                                                                                                                                                                                                                                                                                                                                                                                                                                                                                                                  |
| #6                                                                                               | MeSH descriptor: [Myocardial Revascularization] explode all trees                                                                                                                                                                                                                                                                                                                                                                                                                                                                                                                                                                                                                                                                                                                                                                                                                                                                                                                                                                           |
| #7                                                                                               | ("myocardial infarct*" or "coronary infarct*" or "cardiac infarct*" or "heart infarct*" or "postmyocardial infarct*" or "post-MI" or "AMI" or "STEMI" or "NSTEMI" or "heart attack*" or "coronary attack*" or "cardiac attack*" or "myocardial attack*" or "cardiac event*" or "coronary event*" or "myocardial event*" or "coronary syndrome*" or "cardiac syndrome*" or "myocardial syndrome*" or "bypass grafting" or "coronary artery bypass" or "coronary bypass" or "cardiac bypass" or "CABG" or "coronary thromb*" or "intracoronary thromb*" or "coronary angioplast*" or "intracoronary angioplast*" or "cardiac angioplast*" or "coronary stent*" or "intracoronary stent*" or "cardiac stent*" or "PCI" or "coronary intervention*" or "intracoronary intervention*" or "cardiac intervention*" or "coronary reperfusion*" or "intracoronary reperfusion*" or "cardiac reperfusion*" or "myocardial revasculari*" or "coronary revasculari*" or "cardiac revasculari*" or "myocardial stunning" or "cardiac stunning"):ti,ab,kw |
| #8                                                                                               | #1 or #2 or #3 or #4 or #5 or #6 or #7                                                                                                                                                                                                                                                                                                                                                                                                                                                                                                                                                                                                                                                                                                                                                                                                                                                                                                                                                                                                      |
| #9                                                                                               | MeSH descriptor: [Rehabilitation] explode all trees                                                                                                                                                                                                                                                                                                                                                                                                                                                                                                                                                                                                                                                                                                                                                                                                                                                                                                                                                                                         |
| #10                                                                                              | Any MeSH descriptor with qualifier(s): [Rehabilitation - RH]                                                                                                                                                                                                                                                                                                                                                                                                                                                                                                                                                                                                                                                                                                                                                                                                                                                                                                                                                                                |
| #11                                                                                              | MeSH descriptor: [Rehabilitation Centers] explode all trees                                                                                                                                                                                                                                                                                                                                                                                                                                                                                                                                                                                                                                                                                                                                                                                                                                                                                                                                                                                 |
| #12                                                                                              | MeSH descriptor: [Secondary Prevention] explode all trees                                                                                                                                                                                                                                                                                                                                                                                                                                                                                                                                                                                                                                                                                                                                                                                                                                                                                                                                                                                   |
| #13                                                                                              | ("rehabilitat*" or "rehab" or "cardiorehabilit*" or "secondary prevent*" or "program" or "programme" or "programs" or "programmes"):ti,ab,kw                                                                                                                                                                                                                                                                                                                                                                                                                                                                                                                                                                                                                                                                                                                                                                                                                                                                                                |
| #14                                                                                              | #9 or #10 or #11 or #12 or #13                                                                                                                                                                                                                                                                                                                                                                                                                                                                                                                                                                                                                                                                                                                                                                                                                                                                                                                                                                                                              |
| #15                                                                                              | ("cardiac rehabilitation"):ti,ab,kw                                                                                                                                                                                                                                                                                                                                                                                                                                                                                                                                                                                                                                                                                                                                                                                                                                                                                                                                                                                                         |
| #16                                                                                              | #8 and #14                                                                                                                                                                                                                                                                                                                                                                                                                                                                                                                                                                                                                                                                                                                                                                                                                                                                                                                                                                                                                                  |
| #17                                                                                              | #15 or #16                                                                                                                                                                                                                                                                                                                                                                                                                                                                                                                                                                                                                                                                                                                                                                                                                                                                                                                                                                                                                                  |

| <b>Table SM 1: Search Sources (continued)</b>                            |                                                                                                                                                                                                                                                                                                                                                                                                                                                                                                                                                                                                                                                                                                                                                                                                                                                                                                                                                                                    |
|--------------------------------------------------------------------------|------------------------------------------------------------------------------------------------------------------------------------------------------------------------------------------------------------------------------------------------------------------------------------------------------------------------------------------------------------------------------------------------------------------------------------------------------------------------------------------------------------------------------------------------------------------------------------------------------------------------------------------------------------------------------------------------------------------------------------------------------------------------------------------------------------------------------------------------------------------------------------------------------------------------------------------------------------------------------------|
| <b>CINAHL (Cumulative Index to Nursing and Allied Health Literature)</b> |                                                                                                                                                                                                                                                                                                                                                                                                                                                                                                                                                                                                                                                                                                                                                                                                                                                                                                                                                                                    |
| Search interface: EBSCOhost – Date of search: Dec 22 <sup>nd</sup> 2015  |                                                                                                                                                                                                                                                                                                                                                                                                                                                                                                                                                                                                                                                                                                                                                                                                                                                                                                                                                                                    |
| (S1)                                                                     | MH ("Acute Coronary Syndrome" OR "Angina, Unstable" OR "Coronary Thrombosis" OR "Myocardial Infarction" OR "Shock, Cardiogenic" OR "Myocardial Revascularization" OR "Coronary Artery Bypass" OR "Angioplasty, Transluminal, Percutaneous Coronary" OR "Cardiac Patients")                                                                                                                                                                                                                                                                                                                                                                                                                                                                                                                                                                                                                                                                                                         |
| (S2)                                                                     | TI ("myocardial infarct*" OR "coronary infarct*" OR "cardiac infarct*" OR "heart infarct*" OR "postmyocardial infarct*" OR "post-MI" OR "heart attack*" OR "coronary attack*" OR "cardiac attack*" OR "myocardial attack*" OR "cardiac event*" OR "coronary event*" OR "myocardial event*" OR "coronary syndrome*" OR "cardiac syndrome*" OR "myocardial syndrome*" OR "bypass grafting" OR "coronary artery bypass" OR "coronary bypass" OR "cardiac bypass" OR "coronary thromb*" OR "intracoronary thromb*" OR "coronary angioplast*" OR "intracoronary angioplast*" OR "cardiac angioplast*" OR "coronary stent*" OR "intracoronary stent*" OR "cardiac stent*" OR "coronary intervention*" OR "intracoronary intervention*" OR "cardiac intervention*" OR "coronary reperfusion*" OR "intracoronary reperfusion*" OR "cardiac reperfusion*" OR "myocardial revasculari*" OR "coronary revasculari*" OR "cardiac revasculari*" OR "myocardial stunning" OR "cardiac stunning") |
| (S3)                                                                     | AB ("myocardial infarct*" OR "coronary infarct*" OR "cardiac infarct*" OR "heart infarct*" OR "postmyocardial infarct*" OR "post-MI" OR "heart attack*" OR "coronary attack*" OR "cardiac attack*" OR "myocardial attack*" OR "cardiac event*" OR "coronary event*" OR "myocardial event*" OR "coronary syndrome*" OR "cardiac syndrome*" OR "myocardial syndrome*" OR "bypass grafting" OR "coronary artery bypass" OR "coronary bypass" OR "cardiac bypass" OR "coronary thromb*" OR "intracoronary thromb*" OR "coronary angioplast*" OR "intracoronary angioplast*" OR "cardiac angioplast*" OR "coronary stent*" OR "intracoronary stent*" OR "cardiac stent*" OR "coronary intervention*" OR "intracoronary intervention*" OR "cardiac intervention*" OR "coronary reperfusion*" OR "intracoronary reperfusion*" OR "cardiac reperfusion*" OR "myocardial revasculari*" OR "coronary revasculari*" OR "cardiac revasculari*" OR "myocardial stunning" OR "cardiac stunning") |
| (S4)                                                                     | S1 OR S2 OR S3                                                                                                                                                                                                                                                                                                                                                                                                                                                                                                                                                                                                                                                                                                                                                                                                                                                                                                                                                                     |
| (S5)                                                                     | MH ("Rehabilitation" OR "Rehabilitation, Cardiac" OR "Rehabilitation Centers" OR "Rehabilitation Patients" OR "Conditioning, Cardiopulmonary") OR MW "RH"                                                                                                                                                                                                                                                                                                                                                                                                                                                                                                                                                                                                                                                                                                                                                                                                                          |
| (S6)                                                                     | TI (rehabilitat* OR rehab OR cardiorehabilit* OR "secondary prevent*" OR program OR programme OR programs OR programmes)                                                                                                                                                                                                                                                                                                                                                                                                                                                                                                                                                                                                                                                                                                                                                                                                                                                           |
| (S7)                                                                     | AB (rehabilitat* OR rehab OR cardiorehabilit* OR "secondary prevent*" OR program OR programme OR programs OR programmes)                                                                                                                                                                                                                                                                                                                                                                                                                                                                                                                                                                                                                                                                                                                                                                                                                                                           |
| (S8)                                                                     | S5 OR S6 OR S7                                                                                                                                                                                                                                                                                                                                                                                                                                                                                                                                                                                                                                                                                                                                                                                                                                                                                                                                                                     |
| (S9)                                                                     | S4 AND S8                                                                                                                                                                                                                                                                                                                                                                                                                                                                                                                                                                                                                                                                                                                                                                                                                                                                                                                                                                          |
| (S10)                                                                    | TI "cardiac rehabilitation" OR AB "cardiac rehabilitation"                                                                                                                                                                                                                                                                                                                                                                                                                                                                                                                                                                                                                                                                                                                                                                                                                                                                                                                         |
| (S11)                                                                    | S9 OR S10                                                                                                                                                                                                                                                                                                                                                                                                                                                                                                                                                                                                                                                                                                                                                                                                                                                                                                                                                                          |
| (S12)                                                                    | S9 OR S10 Limiters - Published Date: 19950101-20151231                                                                                                                                                                                                                                                                                                                                                                                                                                                                                                                                                                                                                                                                                                                                                                                                                                                                                                                             |
| (S13)                                                                    | [Wong 2006 CINAHL filter]<br>MH "prognosis+" OR MH "study design+" or random*                                                                                                                                                                                                                                                                                                                                                                                                                                                                                                                                                                                                                                                                                                                                                                                                                                                                                                      |
| (S14)                                                                    | S12 AND S13                                                                                                                                                                                                                                                                                                                                                                                                                                                                                                                                                                                                                                                                                                                                                                                                                                                                                                                                                                        |

**Table SM 1: Search Sources (continued)****LILACS (Literatura Latino-Americana e do Caribe em Ciências da Saúde)**

Search interface: iAHx (<http://lilacs.bvsalud.org/>) – Date of search: Dec 22<sup>nd</sup> 2015 ("Last update: Dec., 18th., 2015")

*[Each line was run and exported separately.]*

#1

((((MH:"Acute Coronary Syndrome" OR MH:"Angina, Unstable" OR MH:"Coronary Occlusion" OR MH:"Coronary Thrombosis" OR MH:"Myocardial Infarction" OR MH:"Myocardial Revascularization") OR ((myocard\$ OR miocard\$ OR coronar\$ OR intracoronar\$ OR cardia\$ OR "unstable angina" OR "angina inestable" OR "angina inestavel") AND (infarct\$ OR infarto\$ OR attack\$ OR ataque\$ OR event\$ OR syndrome\$ OR sindrom\$ OR revasculariza\$ OR puente\$ OR ponte\$ OR bypass OR thromb\$ OR trombos\$ OR angioplast\$ OR oclus\$ OR oclus\$ OR intervenc\$ OR intervention\$ OR stent\$ OR reperfus\$ OR cirurgia OR cirugia))) AND (MH:"Rehabilitation" OR MH:"/rehabilitation" OR MH:"Rehabilitation Centers" OR MH:"Secondary Prevention" OR rehabilita\$ OR reabilita\$ OR rehab OR "secondary prevention" OR "prevencion secundaria" OR "prevencao secundaria" OR program OR programme OR programa OR programs OR programmes OR programas)) OR ("rehabilitacion cardiaca" OR "rehabilitacion cardiovascular" OR "reabilitacao cardiaca" OR "reabilitacao cardiovascular")  
+ "Type of study: Controlled Clinical Trial"

#2

((((MH:"Acute Coronary Syndrome" OR MH:"Angina, Unstable" OR MH:"Coronary Occlusion" OR MH:"Coronary Thrombosis" OR MH:"Myocardial Infarction" OR MH:"Myocardial Revascularization") OR ((myocard\$ OR miocard\$ OR coronar\$ OR intracoronar\$ OR cardia\$ OR "unstable angina" OR "angina inestable" OR "angina inestavel") AND (infarct\$ OR infarto\$ OR attack\$ OR ataque\$ OR event\$ OR syndrome\$ OR sindrom\$ OR revasculariza\$ OR puente\$ OR ponte\$ OR bypass OR thromb\$ OR trombos\$ OR angioplast\$ OR oclus\$ OR oclus\$ OR intervenc\$ OR intervention\$ OR stent\$ OR reperfus\$ OR cirurgia OR cirugia))) AND (MH:"Rehabilitation" OR MH:"/rehabilitation" OR MH:"Rehabilitation Centers" OR MH:"Secondary Prevention" OR rehabilita\$ OR reabilita\$ OR rehab OR "secondary prevention" OR "prevencion secundaria" OR "prevencao secundaria" OR program OR programme OR programa OR programs OR programmes OR programas)) OR ("rehabilitacion cardiaca" OR "rehabilitacion cardiovascular" OR "reabilitacao cardiaca" OR "reabilitacao cardiovascular")  
+ "Type of study: Cohort Study"

| <b>Table SM 1: Search Sources (continued)</b>                                                                                                                          |                                                          |
|------------------------------------------------------------------------------------------------------------------------------------------------------------------------|----------------------------------------------------------|
| <b>CIRRIE (Center for International Rehabilitation Research Information and Exchange) database</b>                                                                     |                                                          |
| Search interface: CIRRIE website ( <a href="http://cirrie.buffalo.edu/database/">http://cirrie.buffalo.edu/database/</a> ) – Date of search: Dec 22 <sup>nd</sup> 2015 |                                                          |
| <i>[Each line was run and exported separately.]</i>                                                                                                                    |                                                          |
| #1                                                                                                                                                                     | Title: "myocardial infarct", Subject: rehabilitation     |
| #2                                                                                                                                                                     | Title: "coronary infarct", Subject: rehabilitation       |
| #3                                                                                                                                                                     | Title: "cardiac infarct", Subject: rehabilitation        |
| #4                                                                                                                                                                     | Title: "heart infarct", Subject: rehabilitation          |
| #5                                                                                                                                                                     | Title: "heart attack", Subject: rehabilitation           |
| #6                                                                                                                                                                     | Title: "coronary attack", Subject: rehabilitation        |
| #7                                                                                                                                                                     | Title: "cardiac attack", Subject: rehabilitation         |
| #8                                                                                                                                                                     | Title: "cardiac event", Subject: rehabilitation          |
| #9                                                                                                                                                                     | Title: "coronary event", Subject: rehabilitation         |
| #10                                                                                                                                                                    | Title: "myocardial event", Subject: rehabilitation       |
| #11                                                                                                                                                                    | Title: "coronary syndrome", Subject: rehabilitation      |
| #12                                                                                                                                                                    | Title: "cardiac syndrome", Subject: rehabilitation       |
| #13                                                                                                                                                                    | Title: "myocardial syndrome", Subject: rehabilitation    |
| #14                                                                                                                                                                    | Title: "bypass grafting", Subject: rehabilitation        |
| #15                                                                                                                                                                    | Title: "coronary artery bypass", Subject: rehabilitation |
| #16                                                                                                                                                                    | Title: "coronary bypass", Subject: rehabilitation        |
| #17                                                                                                                                                                    | Title: "cardiac bypass", Subject: rehabilitation         |
| #18                                                                                                                                                                    | Title: "coronary thromb", Subject: rehabilitation        |
| #19                                                                                                                                                                    | Title: angioplast, Subject: rehabilitation               |
| #20                                                                                                                                                                    | Title: stent, Subject: rehabilitation                    |
| #21                                                                                                                                                                    | Title: "coronary intervention", Subject: rehabilitation  |
| #22                                                                                                                                                                    | Title: "cardiac intervention", Subject: rehabilitation   |
| #23                                                                                                                                                                    | Title: "coronary reperfusion", Subject: rehabilitation   |
| #24                                                                                                                                                                    | Title: "cardiac reperfusion", Subject: rehabilitation    |
| #25                                                                                                                                                                    | Title: "myocardial revasculari", Subject: rehabilitation |
| #26                                                                                                                                                                    | Title: "coronary revasculari", Subject: rehabilitation   |
| #27                                                                                                                                                                    | Title: "cardiac revasculari", Subject: rehabilitation    |
| #28                                                                                                                                                                    | Title: stunning, Subject: rehabilitation                 |
| #29                                                                                                                                                                    | Title: angina, Subject: rehabilitation                   |
| #30                                                                                                                                                                    | Title: "cardiac rehabilitation"                          |



**Table SM 1: Search Sources (continued)****ICTRP (International Clinical Trials Registry Platform)**

Search interface: ICTRP Search Portal (<http://apps.who.int/trialsearch/>) – Date of last search: Dec 22<sup>nd</sup> 2015

- Australian New Zealand Clinical Trials Registry, last data file imported on **14 December 2015**
- Chinese Clinical Trial Registry, last data file imported on **14 December 2015**
- ClinicalTrials.gov, last data file imported on **14 December 2015**
- EU Clinical Trials Register (EU-CTR), last data file imported on **14 December 2015**
- ISRCTN, last data file imported on **14 December 2015**
- The Netherlands National Trial Register, last data file imported on **14 December 2015**
- Brazilian Clinical Trials Registry (ReBec), last data file imported on **7 December 2015**
- Clinical Trials Registry - India, last data file imported on **7 December**
- Clinical Research Information Service - Republic of Korea, last data file imported on **7 December 2015**
- Cuban Public Registry of Clinical Trials, last data file imported on **7 December 2015**
- German Clinical Trials Register, last data file imported on **7 December 2015**
- Iranian Registry of Clinical Trials, last data file imported on **7 December 2015**
- Japan Primary Registries Network, last data file imported on **14 December 2015**
- Pan African Clinical Trial Registry, last data file imported on **7 December 2015**
- Sri Lanka Clinical Trials Registry, last data file imported on **7 December 2015**
- Thai Clinical Trials Register (TCTR), last data file imported on **7 December 2015**

**Table SM 1: Search Sources (continued)**

*[Each line was run and exported separately.]*

**(#1)**

myocardial infarct\* AND rehab\* OR coronary infarct\* AND rehab\* OR cardiac infarct\* AND rehab\* OR heart infarct\* AND rehab\* OR postmyocardial infarct\* AND rehab\* OR post-MI AND rehab\* OR heart attack\* AND rehab\* OR coronary attack\* AND rehab\* OR cardiac attack\* AND rehab\* OR myocardial attack\* AND rehab\* OR cardiac event\* AND rehab\* OR coronary event\* AND rehab\* OR myocardial event\* AND rehab\* OR coronary syndrome\* AND rehab\* OR cardiac syndrome\* AND rehab\* OR myocardial syndrome\* AND rehab\* OR bypass grafting AND rehab\* OR coronary artery bypass AND rehab\* OR coronary bypass AND rehab\* OR cardiac bypass AND rehab\* OR coronary thromb\* AND rehab\* OR intracoronary thromb\* AND rehab\* OR coronary angioplast\* AND rehab\* OR intracoronary angioplast\* AND rehab\* OR cardiac angioplast\* AND rehab\* OR coronary stent\* AND rehab\* OR intracoronary stent\* AND rehab\* OR cardiac stent\* AND rehab\* OR coronary intervention\* AND rehab\* OR intracoronary intervention\* AND rehab\* OR cardiac intervention\* AND rehab\* OR coronary reperfusion\* AND rehab\* OR intracoronary reperfusion\* AND rehab\* OR cardiac reperfusion\* AND rehab\* OR myocardial revasculari\* AND rehab\* OR coronary revasculari\* AND rehab\* OR cardiac revasculari\* AND rehab\* OR myocardial stunning AND rehab\* OR cardiac stunning AND rehab\* OR AMI AND rehab\* OR STEMI AND rehab\* OR NSTEMI AND rehab\* OR PCI AND rehab\* OR CABG AND rehab\* OR PTCA AND rehab\* OR unstable angina AND rehab\*

**(#2)**

myocardial infarct\* AND program\* OR coronary infarct\* AND program\* OR cardiac infarct\* AND program\* OR heart infarct\* AND program\* OR postmyocardial infarct\* AND program\* OR post-MI AND program\* OR heart attack\* AND program\* OR coronary attack\* AND program\* OR cardiac attack\* AND program\* OR myocardial attack\* AND program\* OR cardiac event\* AND program\* OR coronary event\* AND program\* OR myocardial event\* AND program\* OR coronary syndrome\* AND program\* OR cardiac syndrome\* AND program\* OR myocardial syndrome\* AND program\* OR bypass grafting AND program\* OR coronary artery bypass AND program\* OR coronary bypass AND program\* OR cardiac bypass AND program\* OR coronary thromb\* AND program\* OR intracoronary thromb\* AND program\* OR coronary angioplast\* AND program\* OR intracoronary angioplast\* AND program\*

**(#3)**

cardiac angioplast\* AND program\* OR coronary stent\* AND program\* OR intracoronary stent\* AND program\* OR cardiac stent\* AND program\* OR coronary intervention\* AND program\* OR intracoronary intervention\* AND program\* OR cardiac intervention\* AND program\* OR coronary reperfusion\* AND program\* OR intracoronary reperfusion\* AND program\* OR cardiac reperfusion\* AND program\* OR myocardial revasculari\* AND program\* OR coronary revasculari\* AND program\* OR cardiac revasculari\* AND program\* OR myocardial stunning AND program\* OR cardiac stunning AND program\* OR AMI AND program\* OR STEMI AND program\* OR NSTEMI AND program\* OR PCI AND program\* OR CABG AND program\* OR PTCA AND program\* OR unstable angina AND program\*

**(#4)**

cardiac rehabilitation

**Table SM 1: Search Sources (continued)****Footnotes:**

**Cochrane HSS filter:** Cochrane Highly Sensitive Search Strategy for identifying randomized trials in MEDLINE: sensitivity-maximizing version, 2008 revision (available at: <http://handbook.cochrane.org/>)

**Own filter:** Own cohort study filter based on two (unvalidated) search filters: BMJ Cohort Filter (available at: <http://clinicalevidence.bmj.com/x/set/static/ebm/learn/665076.html>) and University of Texas Cohort Filter (available at: [http://libguides.sph.uth.tmc.edu/ovid\\_medline\\_filters](http://libguides.sph.uth.tmc.edu/ovid_medline_filters))

**Wong 2006 Embase filter:** Wong SS, Wilczynski NL, Haynes RB. [Developing optimal search strategies for detecting clinically sound treatment studies in EMBASE](#). *Journal of the Medical Library Association* 2006;94(1):41-7.

**Wong 2006 CINAHL filter:** Wong SS, Wilczynski NL, Haynes RB. [Optimal CINAHL search strategies for identifying therapy studies and review articles](#). *Journal of Nursing Scholarship* 2006;38(2):194-9.

## Excluded studies and justification for exclusion

| <b>Table SM 2: Excluded studies and justification for exclusion</b>                                                                                                              |                                                                                          |                                                                                                                                                                                                                                                        |
|----------------------------------------------------------------------------------------------------------------------------------------------------------------------------------|------------------------------------------------------------------------------------------|--------------------------------------------------------------------------------------------------------------------------------------------------------------------------------------------------------------------------------------------------------|
| <b>Study</b>                                                                                                                                                                     | <b>Reason for exclusion based on</b>                                                     | <b>Study selection level:</b>                                                                                                                                                                                                                          |
| (abstracts and design papers of studies included into CROS meta-analysis are not listed in this table)<br><b>CO</b> , study was included into Cochrane meta-analysis 2016 (1, 2) | (P) Population<br>(I) Intervention<br>(C) Controls<br>(O) Outcomes<br>(OR) Other reasons | PS = PreSelection<br>FTE = Full Text Evaluation<br>SSE = Structured Study Evaluation<br>PS (+) = Only conference abstract available, but study and potential publication has to be followed<br><b>Final search:</b><br><b>Dec 22<sup>nd</sup> 2015</b> |
| <b>1995</b>                                                                                                                                                                      |                                                                                          |                                                                                                                                                                                                                                                        |
| Bondestam E et al.(3)                                                                                                                                                            | (P) Population recruited before 1995                                                     | PS                                                                                                                                                                                                                                                     |
| Cannistra LB et al.(4)                                                                                                                                                           | (C) No control without CR                                                                | PS                                                                                                                                                                                                                                                     |
| Gohlke-Bärwolf C et al.(5)                                                                                                                                                       | (OR) No original study                                                                   | PS                                                                                                                                                                                                                                                     |
| Hamalainen H et al.(6)                                                                                                                                                           | (P) Index event before 1995                                                              | PS                                                                                                                                                                                                                                                     |
| Scherwitz LW et al.(7)                                                                                                                                                           | (P) Population recruited before 1995                                                     | PS                                                                                                                                                                                                                                                     |
| Heller LF et al.(8)                                                                                                                                                              | (I) No comprehensive CR                                                                  | PS                                                                                                                                                                                                                                                     |
| <b>1996</b>                                                                                                                                                                      |                                                                                          |                                                                                                                                                                                                                                                        |
| Jones DA et al.(9)                                                                                                                                                               | (P) Population recruited before 1995                                                     | PS                                                                                                                                                                                                                                                     |
| Lidell E et al.(10)                                                                                                                                                              | (P) Population recruited before 1995                                                     | PS                                                                                                                                                                                                                                                     |
| MRFIT publishers(11)                                                                                                                                                             | (P) Population recruited before 1995                                                     | PS                                                                                                                                                                                                                                                     |
| Allen JK et al.(12)                                                                                                                                                              | (O) No prognostic outcomes as defined by CROS                                            | PS                                                                                                                                                                                                                                                     |
| Engblom E et al.(13) <b>CO</b>                                                                                                                                                   | (P) Population recruited before 1995                                                     | PS                                                                                                                                                                                                                                                     |
| Rugulies R et al(14)                                                                                                                                                             | (C) No control as defined by CROS                                                        | PS                                                                                                                                                                                                                                                     |
| Speccia C et al.(15) <b>CO</b>                                                                                                                                                   | (P) Population recruited from 1992–1995                                                  | PS                                                                                                                                                                                                                                                     |
| <b>1997</b>                                                                                                                                                                      |                                                                                          |                                                                                                                                                                                                                                                        |
| Ornish lifestyle program (16)                                                                                                                                                    | (OR) No original study                                                                   | PS                                                                                                                                                                                                                                                     |
| Almeida P et al. (17)                                                                                                                                                            | (O) No prognostic outcomes                                                               | PS                                                                                                                                                                                                                                                     |
| Bundy C (18)                                                                                                                                                                     | (OR) Only commentary                                                                     | PS                                                                                                                                                                                                                                                     |
| Engblom E et al. (19)                                                                                                                                                            | (P) Population recruited before 1995                                                     | PS                                                                                                                                                                                                                                                     |
| Frasure-Smith et al. (20)                                                                                                                                                        | (I) No intervention as defined by CROS                                                   | PS                                                                                                                                                                                                                                                     |
| Kozlov ID et al. (21)                                                                                                                                                            | (P) Inclusion period to a significant part before 1995<br>(O) No prognostic outcomes     | PS                                                                                                                                                                                                                                                     |
| Lee SS (22)                                                                                                                                                                      | (O) No prognostic outcomes                                                               | PS                                                                                                                                                                                                                                                     |
| Niebauer J et al. (23)                                                                                                                                                           | (P) Population recruited before 1995                                                     | PS                                                                                                                                                                                                                                                     |
| Roseler et al. (24)                                                                                                                                                              | (P) Population recruited 1993–1995<br>(I) Only phase III CR                              | PS                                                                                                                                                                                                                                                     |
| Tanabe K et al. (25)                                                                                                                                                             | (OR) Full paper not available                                                            | PS                                                                                                                                                                                                                                                     |
| Van Dixhoom J et al. (26)                                                                                                                                                        | (P) Population recruited before 1995                                                     | PS                                                                                                                                                                                                                                                     |

**Table SM2: Excluded studies and justification for exclusion (continued)**

| <b>1998</b>                         |      |                                                               |          |
|-------------------------------------|------|---------------------------------------------------------------|----------|
| Ali A et al. (27)                   | (O)  | No prognostic outcomes as defined by CROS                     | PS       |
| Bell JM, (28) <b>CO</b>             | (C)  | No control according to CROS criteria                         | PS + FTE |
| Campbell NC et al. (29)             | (I)  | No exercise                                                   | PS       |
| Carlsson R et al. (30) <b>CO</b>    | (O)  | No predefined prognostic outcomes (only surrogate parameters) | PS + FTE |
| Fattirolli F et al. (31)            | (OR) | Only description of study design                              | PS       |
|                                     | (O)  | Outcomes do not meet CROS criteria                            |          |
| Jitpraphai C et al. (32)            | (P)  | Population recruited before 1995                              | PS       |
| Jolly K et al. (SHIP) (33)          | (O)  | No prognostic outcomes                                        | PS       |
| Nahhas GT et al. (34)               | (OR) | Only abstract                                                 | PS       |
| Ornish D et al. (35)                | (P)  | Trial conducted before 1995                                   | PS       |
| Ornish D (36)                       | (P)  | Population recruited before 1995                              | PS + FTE |
| Walters J et al. (37)               | (P)  | Population recruited before 1995                              | PS       |
|                                     | (I)  | Phase I rehabilitation                                        |          |
| <b>1999</b>                         |      |                                                               |          |
| Stahle A et al. (38) <b>CO</b>      | (I)  | Only exercise                                                 | PS       |
| Ma H et al. (39)                    | (C)  | Not control according to CROS criteria                        | PS       |
| Lisspers J et al. (40)              | (P)  | Population recruited 1993–1995                                | PS       |
| Jolly K et al. (41)                 | (O)  | No outcomes as defined by CROS                                | PS       |
| Johnston M et al. (42)              | (O)  | No outcomes as defined by CROS                                | PS       |
| Hofman Bang C et al. (43) <b>CO</b> | (P)  | Population recruited 1993–1995                                | PS       |
| Dugmore LD et al. (44) <b>CO</b>    | (P)  | Population recruited before 1995                              | PS       |
| Bethell HJN et al. (45)             | (P)  | Population recruited before 1995                              | PS       |
| Wallner S et al. (46)               | (P)  | Population recruited in 1994–1995                             | PS       |
| van Dixhoorn JJ et al. (47)         | (P)  | Population recruitment before 1995                            | PS       |
| Takahashi H et al. (48)             | (P)  | Population recruitment before 1995                            | PS       |
| <b>2000</b>                         |      |                                                               |          |
| Allison TG et al., CHEER (49)       | (I)  | Intervention without exercise                                 | PS       |
| Epstein AM et al. (50)              | (OR) | Only abstract                                                 | PS       |
| See also Goss JR et al. 2002 (51)   | (O)  | No prognostic outcomes                                        |          |
| Fridlund B et al. (52)              | (O)  | No outcomes as defined by CROS                                | PS       |
| Hata R et al. (53)                  | (OR) | Only abstract, full paper not found                           | PS       |
| Naughton J et al. (54)              | (P)  | Population recruited before 1995                              | PS       |
| Pater C et al., CORE study (55)     | (OR) | Only study design, publication of study results not found     | PS       |
| Steffen-Batey L et al. (56)         | (P)  | Population recruited before 1995                              | PS       |
| Corpus Christi Heart Project        |      |                                                               |          |
| Toobert DJ et al. (57) <b>CO</b>    | (O)  | Health related quality of life                                | PS       |
| Women's Lifestyle Heart Trial       |      |                                                               |          |

**Table SM2: Excluded studies and justification for exclusion (continued)**

| <b>2001</b>                                 |      |                                                                                                      |          |
|---------------------------------------------|------|------------------------------------------------------------------------------------------------------|----------|
| Baessler A et al. (58)                      | (P)  | Index events before 1995                                                                             | PS + FTE |
| Belardinelli R et al. (59) <b>CO</b>        | (P)  | Population recruited before 1995                                                                     | PS       |
| ETICA trial                                 | (I)  | Only exercise                                                                                        |          |
| Denollet J et al. (60)                      | (P)  | Population recruited before 1995                                                                     | PS       |
| Fonarow GC et al. (61)                      | (I)  | Intervention does not meet CROS criteria                                                             | PS       |
| CHAMP                                       |      |                                                                                                      |          |
| Hedbäck B et al. (62)                       | (P)  | Population recruited before 1995                                                                     | PS       |
| Higgins HC et al. (63) <b>CO</b>            | (P)  | Patients after PCI                                                                                   | PS       |
|                                             | (O)  | No predefined prognostic outcomes                                                                    |          |
| Whellan DJ et al. (64)                      | (P)  | Index event does not meet CROS criteria and took place before 1995 in a significant part of patients | PS       |
| Sharma B et al. (65) <sup>1</sup>           | (P)  | Population recruited 1991–1996                                                                       | PS       |
| <b>2002</b>                                 |      |                                                                                                      |          |
| Buchwalsky G et al. (66)                    | (I)  | Phase III rehabilitation                                                                             | PS       |
| Desmarais PL et al. (67)                    | (C)  | No control                                                                                           | PS       |
| Goss JR et al. (51)                         | (O)  | No clinical events                                                                                   | PS + FTE |
| Hall JP et al. (68)                         | (O)  | No clinical events                                                                                   |          |
| Kavanagh T et al. (69)                      | (P)  | Recruitment before 1995                                                                              | PS       |
| La Rovere MT et al. (70) <b>CO</b>          | (P)  | Recruitment before 1995                                                                              | PS       |
| Oldridge N et al. (71)                      | (OR) | Meta-analysis                                                                                        | PS       |
| Warren TF (72)                              | (P)  | Index events before 1995                                                                             | PS       |
| Winberg B et al. (73)                       | (P)  | Patient's inclusion period to a significant part before 1995                                         | PS + FTE |
| Wright DJ et al. (74)                       | (O)  | Outcomes do not meet CROS criteria                                                                   | PS       |
| <b>2003</b>                                 |      |                                                                                                      |          |
| Afrasiabi SG et al. (75)                    | (O)  | No prognostic outcomes as defined by CROS                                                            | PS + FTE |
| Aldana SG et al. (76)<br>(Ornish programme) | (O)  | Outcomes do not meet CROS criteria                                                                   | PS       |
| Chiashi K et al. (77)                       | (P)  | Inclusion of study participants before 1995                                                          | PS       |
| Frenn M et al. (78)                         | (P)  | No index event                                                                                       | PS + FTE |
| ISRCTN73884263                              | (OR) | Design paper                                                                                         | PS       |
| BRUM study (79)                             | (C)  | Control does not meet CROS criteria                                                                  |          |
| Johansen S et al. (80)                      | (I)  | No structured and supervised exercise                                                                | PS       |
| Marchionni N et al. (81) <b>CO</b>          | (O)  | No outcomes as defined by CROS                                                                       | PS       |
| Murchie P et al. (82)                       | (P)  | Patients with CAD, no index events described                                                         | PS + FTE |
|                                             | (I)  | No structured exercise                                                                               |          |

**Table SM2: Excluded studies and justification for exclusion (continued)**

|                                                     |      |                                                                                                                             |          |
|-----------------------------------------------------|------|-----------------------------------------------------------------------------------------------------------------------------|----------|
| Pasquali SK et al. (83)                             | (O)  | Functional status as primary endpoint. Rehospitalization as secondary endpoint biased by premature deaths not evaluated     | PS + FTE |
| Sundin O et al. (84)                                | (O)  | No prognostic outcomes                                                                                                      | PS       |
| Vitcenda M (85)                                     | (C)  | No control as defined by CROS                                                                                               | PS       |
| VHSG, Vestfold Heartcare Study Group (86) <b>CO</b> | (P)  | Mixed population with a large part of chronic CAD                                                                           | PS + FTE |
|                                                     | (O)  | No outcomes as defined by CROS, calculating the 5-years CAD risk according to the WOSCOPS study algorithm                   |          |
| Young W et al. (87)                                 | (I)  | Intervention does not meet CROS criteria                                                                                    | PS       |
| <b>2004</b>                                         |      |                                                                                                                             |          |
| Ballegaard S et al. (88)                            | (P)  | Population does not meet CROS criteria                                                                                      | PS       |
|                                                     | (I)  | no structured and supervised Exercise                                                                                       |          |
| Hambrecht R et al. (89) <b>CO</b>                   | (P)  | Only stable angina pectoris                                                                                                 | PS       |
|                                                     | (I)  | Only exercise                                                                                                               |          |
| ISRCTN74601515 (90)                                 | (OR) | Study registration (DANREHAB TRIAL), see also Zwisler AD et al. 2005 <sup>90</sup> and Zwisler AD et al. 2008 <sup>91</sup> | PS       |
|                                                     | (P)  | Population does not meet CROS criteria                                                                                      |          |
| Jiang X (91)                                        | (P)  | No index event as described by CROS                                                                                         | PS       |
|                                                     | (O)  | Follow-up too short (3 months)                                                                                              |          |
| Kotseva K et al. (92)                               | (O)  | No prognostic outcomes                                                                                                      | PS       |
| Murchie P et al. (93)                               | (I)  | No structured supervised exercise                                                                                           | PS       |
| Piesterzeniewicz K et al. (94)                      | (C)  | No control as defined by CROS                                                                                               | PS + FTE |
| Sundarajan V et al. (95)                            | (OR) | design problems: linkage of two data bases resulted in classification error in 30% of the participants                      | PS + FTE |
| Witt BJ et al. (96)                                 | (P)  | Population recruited from 1982–1998                                                                                         | PS + FTE |
| Yu CM et al. (97)                                   | (O)  | No prognostic outcome                                                                                                       | PS       |

**Table SM2: Excluded studies and justification for exclusion (continued)**

| <b>2005</b>                                |      |                                                                                                                 |                |
|--------------------------------------------|------|-----------------------------------------------------------------------------------------------------------------|----------------|
| Austin J et al. (98)                       | (P)  | No index events as defined by CROS                                                                              | PS             |
| Briffa TG et al. <sup>(99)</sup> <b>CO</b> | (O)  | no prognostic outcomes (costs, HRQL)                                                                            | PS + FTE       |
| Dendale P et al. (100)                     | (P)  | No index events as described by CROSS                                                                           | PS + FTE       |
| Lisspers J et al. (101)                    | (P)  | Index events do not meet CROS criteria                                                                          | PS + FTE       |
| Maroto Montero JM et al. (102) <b>CO</b>   | (P)  | Inclusion period starts before 1995                                                                             | PS + FTE       |
| Raftery JP et al. (103)                    | (I)  | No structured exercise                                                                                          | PS + FTE       |
| Sinclair AJ et al. (104)                   | (I)  | Intervention does not meet CROS criteria                                                                        | PS             |
| Zwisler AD et al. (105)                    | (OR) | DANREHAB trial, design paper; See publication of results in 2008 (106)                                          | PS             |
|                                            | (P)  | Population does not meet CROS Criteria (including risk patients without proven CAD)                             |                |
| <b>2006</b>                                |      |                                                                                                                 |                |
| Bhaskaran A et al. (107)                   | (OR) | Meeting abstract; full paper not found                                                                          | PS             |
| Herdy AH et al. (108)                      | (OR) | Meeting abstract See publication of results in 2008 <sup>108</sup>                                              | PS             |
|                                            | (I)  | Intervention does not meet CROS criteria                                                                        |                |
|                                            | (O)  | outcomes do not meet CROS criteria                                                                              |                |
| Kappagoda CT et al. (109)                  | (P)  | No index event as defined by CROS                                                                               |                |
|                                            | (C)  | No controls as defined by CROS                                                                                  |                |
| Kovoor P et al. (110) <b>CO</b>            | (P)  | selectively low risk patients                                                                                   | PS + FTE + SSE |
|                                            | (I)  | minimal frequency of exercise as defined by CROS may not have been achieved                                     |                |
|                                            | (O)  | Primary outcome does not meet CROS criteria                                                                     |                |
| Lear SA et al. (111)                       | (O)  | Outcomes do not meet CROS criteria                                                                              | PS             |
| Soerensen C et al. (112)                   | (OR) | Only abstract; full paper based on this title has not been found; compare Nielsen KM et al. 2008 <sup>113</sup> | PS             |
| Viswanathan K et al. (113)                 | (OR) | Only abstract; full paper not found                                                                             | PS             |
| Zhang YM et al. (114)                      | (I)  | Phase I CR in hospital                                                                                          | PS             |



**Table SM2: Excluded studies and justification for exclusion (continued)**

| <b>2007</b>                      |             |                                                                                         |                |
|----------------------------------|-------------|-----------------------------------------------------------------------------------------|----------------|
| Carrol DL et al. (115)           | (I)         | Intervention does not meet CROS criteria                                                | PS             |
| Hua ST et al. (116)              | (OR)<br>(O) | Meeting abstract<br>outcomes do not meet CROS criteria                                  | PS             |
| Jiang X et al. (117)             | (I)         | Intervention does not meet CROS criteria                                                | PS             |
| Macchi C et al. (118)            | (C)         | No prognostic outcomes<br>No control without CR                                         | PS             |
| Merenich JA et al. (119)         | (I)         | No supervised and professionally controlled exercise sessions                           | PS + FTE       |
| Suaya JA et al. (120)            | (O)         | Outcomes do not meet CROS criteria                                                      | PS + FTE       |
| <b>2008</b>                      |             |                                                                                         |                |
| Batista IBI et al. (121)         | (OR)        | Only abstract, full paper not found                                                     | PS             |
| Canyon S et al. (122)            | (P)         | Mixed population including patients only at CAD risk                                    | PS + FTE + SSE |
| Delaney EK et al. (123)          | (P)         | No index events as defined by CROS                                                      | PS + FTE       |
| Dendale P et al. (124)           | (I)<br>(P)  | No regular supervised exercise<br>Primarily patients after elective PCI                 | PS + FTE       |
| Giannuzzi P et al. (125)         | (I)         | Phase III rehabilitation                                                                | PS             |
| Herdy AH et al. (126)            | (I)<br>(O)  | phase I rehabilitation<br>No outcomes as defined by CROS                                | PS             |
| Huang Y et al. (127)             | (P)         | Population overlaps with Kutner et al. 2006 <sup>128</sup>                              | PS + FTE + SSE |
| Kummel M et al. (128)            | (I)         | No structured exercise                                                                  | PS             |
| Naser A et al. (129)             | (O)         | No outcomes as defined by CROS                                                          | PS             |
| Silva, RC et al. (130)           | (I)         | No structured exercise sessions                                                         |                |
| Zwisler, AD et al. (106)         | (P)         | Mixed population not following CROS criteria, and including patients without proven CAD | PS + FTE + SSE |
| <b>2009</b>                      |             |                                                                                         |                |
| Cortes, OL (131)                 | (OR)        | Systematic review                                                                       | PS             |
| Edstrom-Pluss, C et al. (132)    | (C)<br>(I)  | No control group defined by CROS<br>Evaluation of extended CR                           | PS             |
| Giallauria, F et al. (133)       | (C)<br>(I)  | No control group without CR<br>Phase III rehabilitation                                 | PS             |
| Jolly et al. (134)<br>BRUM study | (C)<br>(O)  | No control group as defined by CROS<br>No prognostic outcomes                           | PS + FTE       |
| King, M et al. (135)             | (C)         | No control group                                                                        | PS             |
| Lafitte, M et al. (136)          | (I)         | No exercise based CR                                                                    | PS + FTE       |
| CEPTA programme                  | (C)         | No control                                                                              |                |

**Table SM2: Excluded studies and justification for exclusion (continued)**

| <b>2010</b>                     |      |                                                                      |          |
|---------------------------------|------|----------------------------------------------------------------------|----------|
| Hamill, BG et al. (137)         | (C)  | No control as defined by CROS                                        | PS       |
| Hansen, D et al. (138)          | (O)  | No control as defined by CROS                                        | PS       |
| NCT01075867 (139)               | (OR) | Study design                                                         | PS       |
| ELIPSE programme                | (I)  | Intervention does not meet CROS criteria                             |          |
| Onishi, T et al. (140)          | (I)  | CR starts too late after index event; exercise intensity is too low  | PS + FTE |
| Silberman, A et al. (141)       | (P)  | No index events as defined by CROS                                   | PS       |
| Soga, Y et al. (142)            | (P)  | Only patients after elective PCI                                     | PS       |
|                                 | (O)  | Outcome is safety of CR after PCI                                    |          |
| <b>2011</b>                     |      |                                                                      |          |
| Boyden, T F et al. (143)        | (OR) | Conference abstract                                                  | PS       |
|                                 | (C)  | No control without CR; see Doll, JA et al. 2015 (144)                |          |
| Gulliksson, M et al. (145)      | (I)  | No exercise based CR                                                 | PS       |
| JPRN-UMIN000005177 (146)        | (P)  | No index event as defined by CROS                                    | PS       |
| Lam, G et al. (147)             | (O)  | Follow-up too short                                                  | PS       |
| Lewinter C et al. (148)         | (OR) | Conference abstract; see also Lewinter C et al. 2012 (149)           | PS       |
|                                 | (I)  | Evaluation of CR referral rather than CR attendance                  |          |
| Milani, RV et al. (150)         | (P)  | Population is a subset of depressed heart failure patients           | PS       |
| Moreno-Palanco, MA et al. (151) | (P)  | Population includes stroke patients                                  | PS       |
| MIRVAS study                    | (I)  | No structured and supervised exercise                                |          |
| Piso, B et al. (152)            | (I)  | Phase III cardiac rehabilitation                                     | PS       |
| Pluss, CE et al. (153)          | (C)  | No control group without CR                                          | PS       |
| Soga, Y et al. (154)            | (P)  | Index event does not meet CROS criteria                              | PS       |
| <b>2012</b>                     |      |                                                                      |          |
| Armstrong, MJ et al. (155)      | (OR) | Conference abstract, See Armstrong MJ et al. 2015(156)               | PS       |
|                                 | (P)  | Population overlaps with the study published by Martin, BJ 2012(157) |          |
| Franklin, BA (158)              | (OR) | Comment referring to West RR et al. (159)                            | PS       |
| Ghroubi, S et al. (160)         | (OR) | Conference abstract                                                  | PS       |
|                                 | (O)  | Outcomes do not meet CROS criteria                                   |          |

**Table SM2: Excluded studies and justification for exclusion (continued)**

|                                                |                    |                                                                                                                                                           |                |
|------------------------------------------------|--------------------|-----------------------------------------------------------------------------------------------------------------------------------------------------------|----------------|
| Iliou, MC et al. (161)<br>French FAST-MI study | (OR)               | Conference abstract, see also Pouche, M et al. 2013 (abstract), (162) and Pouche, M et al. 2015 (163)                                                     | PS             |
| Kubilius, R et al. (164)                       | (P)                | Population does not meet CROS criteria                                                                                                                    | PS             |
| Lewinter, C et al. (149)                       | (I)                | Evaluation of CR referral rather than attendance                                                                                                          | PS             |
| Mayer-Berger, W et al. (165)                   | (I)                | Phase III cardiac rehabilitation                                                                                                                          | PS             |
| Naranjo-Estupinan NF, et al. (166)             | (OR)               | pCCS with a low number of participants and a high grade of asymmetric distribution within three study arms; no further information from authors available | PS + FTE + SSE |
| Ou, HT & Balkrishnan, R (167)                  | (OR)<br>(O)        | Conference abstract, Effect of CR after AMI on cost effectiveness and rehospitalization                                                                   | <b>PS (+)</b>  |
| Parashar, S et al. (168)                       | (O)                | No prognostic outcomes                                                                                                                                    | PS             |
| Rangel, I et al. (169)                         | (C)                | Control does not meet CROS criteria                                                                                                                       | PS             |
| Rideout, A et al. (170)                        | (I)                | Pre-surgical rehabilitation                                                                                                                               | PS             |
| Suzuki, T et al. (171)                         | (P)                | No predefined index event                                                                                                                                 | PS + FTE       |
| <b>2013</b>                                    |                    |                                                                                                                                                           |                |
| Gambogi R et al. (172)                         | (OR)<br>(I)        | Conference abstract, Effect of CR on clinical course, survival and revascularization                                                                      | <b>PS (+)</b>  |
| Hung RK et al. (173)                           | (I)                | No comprehensive CR as defined by CROS                                                                                                                    | PS             |
| Jorstad HT, (174)<br>RESPONSE trial            | (I)                | No structured exercise as defined by CROS                                                                                                                 | PS             |
| Kotseva, K et al. (175)<br>EUROASPIRE III      | (O)                | No prognostic outcomes                                                                                                                                    | PS             |
| Lear SA, et al. (176)                          | (OR)<br>(I)        | conference abstract, not to be followed<br>Internet-based prevention program                                                                              | PS             |
| Longobardi G et al. (177)                      | (O)<br>(OR)<br>(I) | no outcomes as defined by CROS<br>Only abstract, not to be followed<br>Prognostic effect of physical exercise levels before a cardiac event               | PS             |
| Martin BJ et al. (178)                         | (I)                | Study compares fitness levels                                                                                                                             | PS             |
| Meisinger, C et al. (179)                      | (I)                | No structured and supervised Exercise                                                                                                                     | PS             |

| <b>Table SM2: Excluded studies and justification for exclusion (continued)</b> |                                                                                                                      |                |
|--------------------------------------------------------------------------------|----------------------------------------------------------------------------------------------------------------------|----------------|
| Mudrick, DW et al. (180)                                                       | (OR) Conference abstract,<br>(O) Effect of CR and hospital Readmission                                               | <b>PS (+)</b>  |
| Murphy, BM et al. (181)                                                        | (I) No structured supervised exercise                                                                                | PS             |
| Naci, H et al. (182)                                                           | (OR) Meta-analysis                                                                                                   | PS             |
| Panovsky, R et al. (183)                                                       | (P) Only patients with chronic CAD included<br>(C) No control as defined by CROS                                     | PS + FTE + SSE |
| Pouche, M et al. (162)<br>French FAST-MI study                                 | (OR) Conference abstract, see also Pouche M et al. 2015 (165)<br>(I) CR referral rather than Participation           | PS             |
| Russo N et al. (184)                                                           | (OR) Conference abstract, not to be followed<br>(C) No control                                                       | PS             |
| Santaularia N et al. (185)                                                     | (OR) Study design RCT to evaluate the effect of a structured exercise program in CAD patients with ischemia          | <b>PS (+)</b>  |
| Sobolev, M. et al. (186)                                                       | (OR) Conference abstract<br>(O) Comparison of re-hospitalization rates between CR attenders and non-attenders        | <b>PS (+)</b>  |
| Turkstra, E et al. (187)                                                       | (I) Intervention does not meet CROS criteria<br>(O) Health related quality of life and physical activity             | PS             |
| Vervueren, PL et al. (188)<br>French MONICA registry                           | (OR) Conference abstract                                                                                             | <b>PS (+)</b>  |
| <b>2014</b>                                                                    |                                                                                                                      |                |
| ACTRN12614000284662, (189)<br>Central Australian heart protection Study        | (OR) Registration of study design,<br>(I) Prognostic effect of a family based secondary prevention program after ACS | <b>PS (+)</b>  |
| Alter DA, et al. (190)                                                         | (C) No comparison between CR and non CR                                                                              | PS             |
| Anderson LJ, & Taylor RS (191)                                                 | (OR) Review of meta-analyses                                                                                         | PS             |
| Cobo Gomez N et al. (192)                                                      | (P) No index events as defined by CROS                                                                               | PS             |
| Dunlay SM et al. (193)                                                         | (P) Recruitment 1987–2010                                                                                            | PS + FTE + SSE |
| Otero Chulian, E et al. (194)                                                  | (OR) Conference abstract, to be followed                                                                             | <b>PS (+)</b>  |
| Expósito-Tirado JA et al. (195)                                                | (C) No control as defined by CROS                                                                                    | PS             |
| Kamath, DY et al. (196)                                                        | (OR) Design paper, not to be followed<br>(I) Intervention does not meet CROS Criteria                                | PS             |

| <b>Table SM2: Excluded studies and justification for exclusion (continued)</b> |             |                                                                                                |                |
|--------------------------------------------------------------------------------|-------------|------------------------------------------------------------------------------------------------|----------------|
| Kim, SS et al. (197)                                                           | (I)         | No structured and supervised Exercise                                                          | PS + FTE       |
| Kureshi F et al. (198)                                                         | (OR)        | Conference abstract, Effect of CR on health status scores and mortality after AMI              | <b>PS (+)</b>  |
| Lewinter C et al. (199)                                                        | (I)         | CR referral rather than CR Attendance; see also Lewinter C et al. 2011 and 2012, (148, 149)    | PS + FTE + SSE |
| Lewinter C et al. (200)<br>DANREHAB trial                                      | (OR)<br>(P) | Conference abstract<br>Only heart failure patients without primary ACS                         | PS             |
| Lubinskaya, E et al. (201)                                                     | (OR)        | Conference abstract, effect of CR on cost effectiveness including prognosis                    | <b>PS (+)</b>  |
| Martin, BJ et al. (202)                                                        | (P)         | Overlap of population with earlier publications, see Martin BJ et al. 2012 (157)               | PS + FTE + SSE |
| Maddison, R et al. (203) <b>CO</b><br>REMOTE-CR                                | (I)         | Intervention does not meet CROS criteria                                                       | PS             |
| Ramirez -Moreno, A et al. (204)                                                | (C)         | no controls as defined by CROS                                                                 | PS             |
|                                                                                | (O)         | no outcomes as defined by CROS                                                                 |                |
| Santoalha, JM et al. (205)                                                     | (OR)        | Conference abstract, not to be followed                                                        | <b>PS (+)</b>  |
|                                                                                | (C)         | no control group                                                                               |                |
|                                                                                | (O)         | RCT evaluating CR compliance rather than CR attendance.                                        |                |
| Sharma, R et al. (206)<br>APPROACH registry                                    | (OR)        | Conference abstract                                                                            | <b>PS (+)</b>  |
|                                                                                | (P)         | APPROACH registry 2002–2012                                                                    |                |
| <b>2015</b>                                                                    |             |                                                                                                |                |
| Armstrong MJ et al.(156)                                                       | (P)         | Population Overlap of population compared to study of Martin et al. 2012 (confirmed by author) | PS + FTE       |
| Bubnova, M et al. (207)                                                        | (OR)        | Conference abstract                                                                            | <b>PS (+)</b>  |
|                                                                                | (I)         | Intervention might not follow CROS criteria of multi-component CR                              |                |
| Chen, HM et al. (208)                                                          | (I)         | Only phase I cardiac rehabilitation                                                            | PS + FTE + SSE |
| Chew, DP et al. (209)                                                          | (OR)        | Design paper                                                                                   | PS             |
|                                                                                | (I)         | Application of risk stratification tool, no multi-component CR                                 |                |

**Table SM2: Excluded studies and justification for exclusion (continued)**

|                                                        |                    |                                                                                                                                                      |               |
|--------------------------------------------------------|--------------------|------------------------------------------------------------------------------------------------------------------------------------------------------|---------------|
| Colbert, JD et al. (210)<br>APPROACH and CWIC registry | (P)                | Population considerably overlaps with Martin BJ et al. as confirmed by authors                                                                       | PS + FTE      |
| Cobo Gomez, N et al. (211)                             | (OR)<br>(O)        | Conference abstract<br>Mortality and events after PCI in patients with incomplete re-vascularization                                                 | <b>PS (+)</b> |
| Cobo Gomez, N et al. (212)                             | (OR)<br>(P)        | Conference abstract,<br>Patients with ischemic cardiomyopathy and reduced LV-function                                                                | <b>PS (+)</b> |
| Coll-Fernandez, R. et al. (213)                        | (OR)<br>(P)        | Conference abstract<br>Population with a large overlap to a previous study of the same group, Coll-Fernandez, R et al. 2014 <sup>214</sup>           | PS            |
| Deljanin Ilic M, et al. (214)                          | (OR)<br>(C)        | Conference abstract<br>No control group as defined by CROS                                                                                           | PS            |
| Doll, JA et al. (144)<br>ACTION Registry-GWTG          | (C)                | No control group without CR                                                                                                                          | PS + FTE      |
| Gencer, B et al. (215)<br>Swiss ELIPS program          | (OR)<br>(I)        | Conference abstract<br>Intervention does not meet CROS Criteria                                                                                      | PS            |
| Kadda, O et al. (216)                                  | (I)                | No CR program as defined by CROS, predominantly life style instruction program                                                                       | PS + FTE      |
| NCT02584192 (217)                                      | (OR)<br>(O)        | Trial registration<br>No prognostic outcomes as defined by CROS                                                                                      | PS            |
| NTR5306 (218)                                          | (OR)               | Trial registration, not to be followed                                                                                                               | PS            |
| Pouche, M. et al. (163)<br>French FAST-MI registry     | (C)<br>(I)         | No control group<br>Only evaluation of CR referral, but not CR attendance (confirmed by author)                                                      | PS + FTE      |
| Romero Reyes, MJ et al. (219)                          | (OR)<br>(P)        | Conference abstract,<br>Only elective PCI?                                                                                                           | <b>PS (+)</b> |
| Sanchez Martinez, M et al. (220)                       | (OR)<br>(O)        | Conference abstract<br>No prognostic outcomes                                                                                                        | PS            |
| Vataman, EB et al. (221)                               | (OR)<br>(O)        | Conference abstract<br>Rehospitalization rate                                                                                                        | <b>PS (+)</b> |
| Wang, W et al. (222)                                   | (OR)<br>(I)<br>(O) | Conference abstract<br>home based self-management program, no structured supervised exercise<br>Risk parameters and unplanned use of health services | PS            |

## Study evaluation: Newcastle – Ottawa Scale (NOS)

**Table SM 3: Evaluation of controlled cohort studies: Newcastle – Ottawa Scale (NOS)**

| Study                                                                                                                          | Boulay P et al. (223) | Norris CM et al. (224) | Kutner NG et al. (225) | Milani RV et al. (226) | Nielsen KM et al. (227) | Alter DA et al. (228) | Hansen D et al. (229) | Suaya JA et al. (230) | Jünger J et al. (231) | Goel K et al. (232) | Kim C et al. (233) | Schwaab B et al. (234) | Martin BJ et al. (157) | Beauchamp A et al. (235) | Lee HY et al. (236) | Marzolini S et al. (237) | Pack QR et al. (238) | Coll-Fernandez R et al. (239) | Prince DZ et al. (240) | Rauch B et al. (241) | Goel K et al. (242) | De Vries H et al. (243) | Meurs M et al. (244) | Schlitt A et al. (245) |          |
|--------------------------------------------------------------------------------------------------------------------------------|-----------------------|------------------------|------------------------|------------------------|-------------------------|-----------------------|-----------------------|-----------------------|-----------------------|---------------------|--------------------|------------------------|------------------------|--------------------------|---------------------|--------------------------|----------------------|-------------------------------|------------------------|----------------------|---------------------|-------------------------|----------------------|------------------------|----------|
| <b>Basic design</b>                                                                                                            | rCCS                  | rCCS                   | rCCS                   | rCCS                   | rCCS                    | rCCS                  | pCCS                  | rCCS                  | rCCS                  | rCCS                | pCCS               | rCCS                   | pCCS                   | rCCS                     | pCCS                | pCCS                     | rCCS                 | pCCS                          | rCCS                   | pCCS                 | rCCS                | rCCS                    | rCCS                 | rCCS                   |          |
| <b>Selection of the participants</b>                                                                                           |                       |                        |                        |                        |                         |                       |                       |                       |                       |                     |                    |                        |                        |                          |                     |                          |                      |                               |                        |                      |                     |                         |                      |                        |          |
| Representativeness of exposed cohort *                                                                                         | +                     | +                      | 0                      | 0                      | +                       | +                     | +                     | +                     | +                     | +                   | 0                  | 0                      | +                      | +                        | +                   | +                        | +                    | +                             | +                      | +                    | +                   | +                       | 0                    | 0                      |          |
| Selection of control                                                                                                           | 0                     | +                      | +                      | +                      | +                       | +                     | 0                     | +                     | +                     | +                   | +                  | +                      | +                      | +                        | +                   | +                        | +                    | +                             | +                      | +                    | +                   | +                       | +                    | +                      | +        |
| Ascertainment of exposure                                                                                                      | +                     | +                      | +                      | +                      | +                       | +                     | +                     | +                     | +                     | +                   | 0                  | +                      | +                      | +                        | +                   | +                        | +                    | +                             | +                      | +                    | +                   | +                       | +                    | +                      | 0        |
| Outcome not present at start of study †                                                                                        | 0                     | 0                      | 0                      | 0                      | 0                       | 0                     | +                     | 0                     | 0                     | 0                   | +                  | 0                      | +                      | 0                        | +                   | +                        | 0                    | +                             | 0                      | +                    | 0                   | 0                       | 0                    | 0                      | 0        |
| <b>Comparability of the cohorts</b>                                                                                            |                       |                        |                        |                        |                         |                       |                       |                       |                       |                     |                    |                        |                        |                          |                     |                          |                      |                               |                        |                      |                     |                         |                      |                        |          |
| <b>Controls for most important factors, Intervention and controls are taken from the same cohort</b>                           | <b>0</b>              | <b>+</b>               | <b>+</b>               | <b>+</b>               | <b>+</b>                | <b>+</b>              | <b>0</b>              | <b>+</b>              | <b>+</b>              | <b>+</b>            | <b>+</b>           | <b>+</b>               | <b>+</b>               | <b>+</b>                 | <b>+</b>            | <b>+</b>                 | <b>+</b>             | <b>+</b>                      | <b>0</b>               | <b>+</b>             | <b>+</b>            | <b>+</b>                | <b>+</b>             | <b>+</b>               | <b>+</b> |
| <b>Outcomes</b>                                                                                                                |                       |                        |                        |                        |                         |                       |                       |                       |                       |                     |                    |                        |                        |                          |                     |                          |                      |                               |                        |                      |                     |                         |                      |                        |          |
| Assessment of outcomes                                                                                                         | 0                     | +                      | +                      | +                      | +                       | +                     | +                     | +                     | +                     | +                   | 0                  | +                      | +                      | +                        | +                   | +                        | +                    | +                             | +                      | +                    | +                   | +                       | +                    | +                      | +        |
| Follow-up long enough?                                                                                                         | +                     | +                      | +                      | +                      | +                       | +                     | +                     | +                     | +                     | +                   | +                  | +                      | +                      | +                        | +                   | +                        | +                    | +                             | +                      | +                    | +                   | +                       | +                    | +                      | +        |
| Adequacy of follow-up                                                                                                          | 0                     | +                      | +                      | 0                      | +                       | +                     | +                     | +                     | +                     | +                   | +                  | +                      | 0                      | +                        | +                   | +                        | +                    | +                             | +                      | +                    | +                   | +                       | +                    | 0                      | 0        |
| <b>Sum of positive adjudications (+)</b>                                                                                       | <b>3</b>              | <b>8</b>               | <b>7</b>               | <b>6</b>               | <b>8</b>                | <b>8</b>              | <b>6</b>              | <b>7</b>              | <b>7</b>              | <b>7</b>            | <b>4</b>           | <b>6</b>               | <b>7</b>               | <b>7</b>                 | <b>8</b>            | <b>8</b>                 | <b>7</b>             | <b>8</b>                      | <b>6</b>               | <b>8</b>             | <b>7</b>            | <b>7</b>                | <b>5</b>             | <b>4</b>               |          |
| *representativeness was regarded to be limited if the population was recruited from pre-existing studies with differing goals. |                       |                        |                        |                        |                         |                       |                       |                       |                       |                     |                    |                        |                        |                          |                     |                          |                      |                               |                        |                      |                     |                         |                      |                        |          |
| † retrospective studies were adjudicated with “0”                                                                              |                       |                        |                        |                        |                         |                       |                       |                       |                       |                     |                    |                        |                        |                          |                     |                          |                      |                               |                        |                      |                     |                         |                      |                        |          |

## Sensitivity analyses

| Table SM 4: Sensitivity analyses |            |        |                                                                        |                                                              |                             |                                                          |                      |
|----------------------------------|------------|--------|------------------------------------------------------------------------|--------------------------------------------------------------|-----------------------------|----------------------------------------------------------|----------------------|
| Outcome                          | Population | Design | Reason for sensitivity analysis                                        | HR (95% CI)                                                  | OR (95% CI); pooling method | Statistical heterogeneity: I-squared tau-squared p-value |                      |
| Total mortality                  | ACS        | rCCS   | Meurs M et al. 2015: data of independent groups used (244)             | 0.58 (0.42-0.82)                                             |                             | 48.8%; 0.044; p=0.14                                     |                      |
|                                  | ACS        | rCCS   | Nielsen KM et al. 2008: rates for 1-year mortality used (227)          |                                                              | 0.25 (0.15-0.40); MH *      | 17.1%; 0.052; p=0.27                                     |                      |
|                                  | CABG       | rCCS   | De Vries H et al. 2015: data of independent groups used (243)          | 0.62 (0.54-0.71)                                             |                             | 0.0%; 0.0; p=0.43                                        |                      |
|                                  | CABG       | rCCS   | Goel K et al. 2013: data of independent groups used (242)              | 0.56 (0.45-0.69)                                             |                             | 35.7%; 0.018; p=0.20                                     |                      |
|                                  | MIXED      | rCCS   | Goel K et al. 2011: data of propensity score stratification used (232) | 0.52 (0.35-0.76)                                             |                             | 84.2%; 0.15; p<0.0001                                    |                      |
|                                  | MIXED      | rCCS   | Schlitt A et al. 2015: data of independent groups used (245)           | 0.45 (0.27-0.77)                                             |                             | 92.8%; 0.331 p<0.0001                                    |                      |
|                                  |            |        | rCCS                                                                   | Norris CM et al, 2004: rates for matched groups used(224)    |                             | 0.83 (0.25-2.74); MH                                     | 70.0%; 0.219; p=0.04 |
|                                  |            | MIXED  | pCCS                                                                   | Martin BJ et al. 2012: data of independent groups used (157) | 0.58 (0.48-0.70)            |                                                          | NA †                 |
| Cardio-vascular mortality        | MIXED      | rCCS   | Goel K et al. 2011: data of propensity score stratification used (232) | 0.61 (0.41-0.91)                                             |                             | NA                                                       |                      |
| Non fatal myocardial infarction  | ACS        | RCT    | West RR et al. 2012: data for independent groups used (159)            |                                                              | 0.80 (0.5-1.3); MH          | NA                                                       |                      |
|                                  | MIXED      | rCCS   | Goel K et al. 2011: data of propensity score stratification used (232) | 1.07 (0.85-1.35)                                             |                             | NA                                                       |                      |



**Table SM 4: Sensitivity analyses (continued)**

|                                                    |       |      |                                                                        |                  |                      |    |
|----------------------------------------------------|-------|------|------------------------------------------------------------------------|------------------|----------------------|----|
| Unplanned readmission for any cardiovascular event | ACS   | RCT  | West RR et al. 2012: data for independent groups used (159)            |                  | 1.09 (0.82-1.44); MH | NA |
|                                                    | MIXED | pCCS | Martin BJ et al. 2012: data of independent groups used (157)           | 0.68 (0.55-0.84) |                      | NA |
| Combined endpoints                                 | MIXED | rCCS | Goel K et al. 2011: data of propensity score stratification used (232) | 0.92 (0.79-1.08) |                      | NA |

\* MH, Mantel-Haenszel pooling; †NA, not applicable

## Checklist according to MOOSE and PRISMA statements

| <b>Table SM 5: Checklists of reporting</b> |                                                            |                               |                                                  |
|--------------------------------------------|------------------------------------------------------------|-------------------------------|--------------------------------------------------|
| <b>MOOSE statement (246)</b>               |                                                            | <b>PRISMA statement (247)</b> |                                                  |
| <b>Section, topic</b>                      | <b>Described in manuscript: yes/no; comments</b>           | <b>Section, topic</b>         | <b>Described in manuscript: yes/no; comments</b> |
|                                            |                                                            | <b>Title</b>                  | Yes                                              |
|                                            |                                                            | Structured summary            | Yes                                              |
| <b>Reporting of Background</b>             |                                                            | <b>Introduction</b>           |                                                  |
| Problem definition                         | Yes, Introduction                                          | Rational                      | Yes                                              |
| Hypothesis                                 | Yes, Introduction                                          | Objectives                    | Yes                                              |
| Description of study outcomes              | Yes, Methods, Table 1                                      |                               |                                                  |
| Type of intervention                       | Yes, Methods, Table 1                                      |                               |                                                  |
| Type of study designs                      | Yes, Methods, Table 1                                      |                               |                                                  |
| Study population                           | Yes, Methods, Table 1                                      |                               |                                                  |
| <b>Reporting of Search Strategy</b>        |                                                            |                               |                                                  |
| Qualification of searchers                 | Yes, Methods                                               |                               |                                                  |
| Search strategy, time period               | Yes, Methods, Supplemental Material Table SM 1             |                               |                                                  |
| Effort to include all available studies    | Yes, Methods, Figure 1, Table 2                            |                               |                                                  |
| Data bases searched                        | Yes, Summary, Methods, Supplemental Material, Table SM 1   |                               |                                                  |
| Search software used                       | Yes, Methods                                               |                               |                                                  |
| Use of hand-searching                      | Yes, routinely done in reference lists of selected studies |                               |                                                  |
| List of citations located and excluded     | Yes, Table 2 and Supplemental Material, Table SM 1         |                               |                                                  |

| <b>Table SM 5: Checklists of reporting (continued)</b> |                                                              |                                    |                                                                                   |
|--------------------------------------------------------|--------------------------------------------------------------|------------------------------------|-----------------------------------------------------------------------------------|
| <b>MOOSE statement</b>                                 |                                                              | <b>PRISMA statement</b>            |                                                                                   |
| <b>Section, topic</b>                                  | <b>Described in manuscript: yes/no; comments</b>             | <b>Section, topic</b>              | <b>Described in Manuscript: yes/no; Comments</b>                                  |
| Methods of handling abstracts and unpublished studies  | Yes, Supplemental Material, Table SM2                        |                                    |                                                                                   |
| Description of contact to authors                      | Yes, Table 2                                                 |                                    |                                                                                   |
| <b>Reporting of Methods</b>                            |                                                              | <b>Reporting of Methods</b>        |                                                                                   |
| Appropriateness of studies assessed                    | Yes, Table 2                                                 | Protocol and registration          | Yes; PROSPERO CRD42014007084                                                      |
| Rational for selection and coding of data              | Yes, Methods                                                 | Eligibility criteria, PICOS        | Yes, Methods, Table 1                                                             |
| Documentation of how data were classified and coded    | Yes, Methods, Figure 1                                       | Information sources                | Yes; Methods, Supplemental Material Table SM 1                                    |
| Assessment of confounding                              | Yes, Methods, Tables 4a, 4b, Supplemental Material Table SM3 | Search                             | Electronic search strategy described in Methods, Supplemental Material, Table SM1 |
| Assessment of study quality                            | Yes, Methods, Tables 4a, 4b, SM3                             | Study selection                    | Yes; Methods, Fig. 1; Supplemental Material. Tables SM1, SM2                      |
| Assessment of heterogeneity                            | Yes, Methods, Figure 2, Table 3                              | Data collection process            | Yes; Methods                                                                      |
| Description of statistical methods                     | Yes, Methods                                                 | Data items                         | Yes, Methods, Table 1 (predefined PICOs)                                          |
| Appropriate Figures and Tables                         | Yes                                                          | Risk of bias in individual studies | Yes; Methods, Tables 4a, 4b; Supplemental Material, Table SM3                     |
|                                                        |                                                              | Summary measures                   | Yes, Methods; Results                                                             |
|                                                        |                                                              | Synthesis of results               | Yes, Methods                                                                      |
|                                                        |                                                              | Risk of bias across the studies    | Yes, Methods                                                                      |
|                                                        |                                                              | Additional analyses                | Yes, sensitivity analyses, Supplemental Material, Table SM3                       |
| <b>Reporting of Results</b>                            |                                                              | <b>Reporting of Results</b>        |                                                                                   |
| Giving descriptive information for each study included | Yes, Table 2                                                 | Study selection                    | Yes, Results, Figure 1                                                            |
|                                                        |                                                              | Study characteristics              | Yes, Table 2                                                                      |
|                                                        |                                                              | Results of individual studies      | Yes, Table 2                                                                      |
|                                                        |                                                              | Risk of bias within the studies    | Yes, Tables 4a,b; Suppl. Material, Table SM 3                                     |
| Graphics and tables summarizing results                | Yes, Figure 2, Table 3                                       | Synthesis                          | Yes, Figure 2, Table 3                                                            |

| <b>Table SM 5: Checklists of reporting (continued)</b> |                                                  |                                         |                                                             |
|--------------------------------------------------------|--------------------------------------------------|-----------------------------------------|-------------------------------------------------------------|
| <b>MOOSE statement</b>                                 |                                                  | <b>PRISMA statement</b>                 |                                                             |
| <b>Section, topic</b>                                  | <b>Described in manuscript: yes/no; comments</b> | <b>Section, topic</b>                   | <b>Described in Manuscript: yes/no; Comments</b>            |
| Indication of statistical uncertainty                  | Yes, Figure 2, Table 3                           | Risk of bias across studies             | Addressed, see “statistical analysis” in Methods            |
| Results of sensitivity testing                         | Yes, Results, Supplemental Material, Table SM 4  | Additional analyses                     | Yes, sensitivity analysis, Supplemental Material Table SM 4 |
| <b>Reporting of Discussion</b>                         |                                                  | <b>Reporting of Discussion</b>          |                                                             |
| Quantitative assessment of bias                        | Yes                                              | Summary of evidence                     | Yes                                                         |
| Justification of exclusion                             | Yes                                              | Limitations                             | Yes                                                         |
| Assessment of quality                                  | Yes                                              |                                         |                                                             |
| <b>Reporting of Conclusions</b>                        |                                                  | <b>Reporting of Conclusions</b>         |                                                             |
| Consideration of alternative explanations              | Yes                                              | Conclusions                             | Yes                                                         |
| Generalization of the conclusions                      | Yes                                              | General interpretation and implications | Yes                                                         |
| Guidelines for future research                         | Yes                                              | <b>Funding</b>                          |                                                             |
| Disclosure of funding source                           | Yes                                              | Funding sources                         | Yes                                                         |

## References

1. Anderson L, Oldridge N, Thompson DR, Zwisler AD, Rees K, Martin N, et al. Exercise-based cardiac rehabilitation for coronary heart disease. *J Am Coll Cardiol* 2016;67(1):1-12.
2. Anderson L, Thompson DR, Oldridge N, Zwisler AD, Rees K, Martin N, et al. Exercise-based cardiac rehabilitation for coronary heart disease. *Cochrane Database of Systematic Reviews* 2016;DOI 10.1002/14651858.CD001800.pub4 (Issue 1. ).
3. Bondestam E, Breikss A, Hartford M. Effects of early rehabilitation on consumption of medical care during the first year after acute myocardial infarction in patients > or = 65 years of age. *The American journal of cardiology* 1995;75(12):767-71.
4. Cannistra LB, Omalley CJ, Balady GJ. Comparison of Outcome of Cardiac Rehabilitation in Black-Women and White Women. *Am J Cardiol* 1995;75(14):890-3.
5. Gohlke-Barwolf C, Gohlke H. Further evidence for beneficial effects of comprehensive cardiac rehabilitation in men with coronary artery disease United Kingdom1995 [8:[1021-2]. Available from: <http://ovidsp.ovid.com/ovidweb.cgi?T=JS&PAGE=reference&D=emed3&NEWS=N&AN=1995262332>.
6. Hamalainen H, Luurila OJ, Kallio V, Knuts LR. Reduction in sudden deaths and coronary mortality in myocardial infarction patients after rehabilitation. 15 year follow-up study. *European heart journal* 1995;16(12):1839-44.
7. Scherwitz LW, Brusis OA, Kesten D, Safian PA, Hasper E, Berg A, et al. [Life style changes in patients with myocardial infarct in the framework of intramural and ambulatory rehabilitation-- results of a German pilot study]. *Zeitschrift fur Kardiologie* 1995;84(3):216-21.
8. Heller RF, Lim L, Valenti L, Knapp J. A randomised controlled trial of community based counselling among those discharged from hospital with ischaemic heart disease. *Australian and New Zealand journal of medicine* 1995;25(4):362-4.
9. Jones DA, West RR. Psychological rehabilitation after myocardial infarction: multicentre randomised controlled trial. *British Medical Journal* 1996;313(7071):1517-21.
10. Lidell E, Fridlund B. Long-term effects of a comprehensive rehabilitation programme after myocardial infarction. *Scandinavian journal of caring sciences* 1996;10(2):67-74.
11. Mortality after 16 years for participants randomized to the Multiple Risk Factor Intervention Trial. *Circulation* 1996;94(5):946-51.
12. Allen JK. Coronary risk factor modification in women after coronary artery bypass surgery. *Nursing research* 1996;45(5):260-5.
13. Engblom E, Korpilahti K, Hamalainen H, Puukka P, Ronnema T. Effects of five years of cardiac rehabilitation after coronary artery bypass grafting on coronary risk factors. *The American journal of cardiology* 1996;78(12):1428-31.
14. Rugulies R, Jager A, Benesch L, Siegrist J. Comprehensive lifestyle changes among patients with CHD and the integration of inpatient and outpatient cardiac rehabilitation: First results of a secondary prevention intervention trial. *Zeitschrift fur Gesundheitswissenschaften [Internet]*. 1996; 4(3):[234-47 pp.]. Available from: <http://onlinelibrary.wiley.com/o/cochrane/clcentral/articles/114/CN-00598114/frame.html>.
15. Specchia G, DeServi S, Scire A, Assandri J, Berzuini C, Angoli L, et al. Interaction between exercise training and ejection fraction in predicting prognosis after a first myocardial infarction. *Circulation* 1996;94(5):978-82.
16. Ornish lifestyle modification program continues to produce impressive outcomes for CHD. *Healthcare demand & disease management* 1997;3(4):59-61.
17. Almeida P, Miranda F, Silva P, Goncalves H, Ribeiro J, Raio J, et al. [The effects of a cardiac rehabilitation program on 2 populations of coronary patients: acute myocardial infarct and coronary bypass surgery]. *Revista portuguesa de cardiologia* 1997;16(10):767-72, 44-5.

18. Bundy C. Rehabilitation after heart attack [11] United Kingdom 1997 [7085:[979-80]. Available from:  
<http://ovidsp.ovid.com/ovidweb.cgi?T=JS&PAGE=reference&D=emed4&NEWS=N&AN=1997097814>.
19. Engblom E, Korpilahti K, Hamalainen H, Ronnema T, Puukka P. Quality of life and return to work 5 years after coronary artery bypass surgery. Long-term results of cardiac rehabilitation. *Journal of cardiopulmonary rehabilitation* 1997;17(1):29-36.
20. Frasure-Smith N, Lesperance F, Prince RH, Verrier P, Garber RA, Juneau M, et al. Randomised trial of home-based psychosocial nursing intervention for patients recovering from myocardial infarction. *Lancet* 1997;350(9076):473-9.
21. Kozlov ID, Fomina RF, Apanasevich VV, Filatova VN, Avramenko TV. [The effect of a 5-year program of IHD prevention on the risk profile and mortality]. *Terapevticheskii arkhiv* 1997;69(1):14-7.
22. Lee SS. Hospital-home care critical pathways in cardiothoracic disease management: one-year outcome data of 164 post-operative cardiothoracic surgical patients. *Journal of Care Management* 1997;3(2):31-2, 7-8, 44; <http://www.redi-bw.de/db/ebSCO.php/search.ebscohost.com>.
23. Niebauer J, Hambrecht R, Velich T, Hauer K, Marburger C, Kalberer B, et al. Attenuated progression of coronary artery disease after 6 years of multifactorial risk intervention - Role of physical exercise. *Circulation* 1997;96(8):2534-41.
24. Roseler S, Schwartz FW, Karoff M. [Evaluation of the effectiveness of an ambulatory after-care rehabilitation program]. *Gesundheitswesen* 1997;59(4):236-41.
25. Tanabe K, Yokoyama Y, Yamamoto A, Murayama M, et al. Cardiac Rehabilitation in Patients with Myocardial Infarction. *Japanese Journal of Rehabilitation Medicine* 1997;34(4):257.
26. van Dixhoorn J. [Favorable effects of breathing and relaxation instructions in heart rehabilitation: a randomized 5-year follow-up study]. *Nederlands tijdschrift voor geneeskunde* 1997;141(11):530-4.
27. Ali A, Mehra MR, Lavie CJ, Malik FS, Murgu JP, Lohmann TP, et al. Modulatory impact of cardiac rehabilitation on hyperhomocysteinemia in patients with coronary artery disease and "normal" lipid levels. *The American journal of cardiology* 1998;82(12):1543-5.
28. Bell JM. A comparison of a multi-disciplinary home based cardiac rehabilitation programme with comprehensive conventional rehabilitation in post-myocardial infarction patients. Thesis submitted to the University of London for the degree of Doctor of Philosophy [Internet]. 1998. Available from: <http://onlinelibrary.wiley.com/o/cochrane/clcentral/articles/296/CN-00858296/frame.html>.
29. Campbell NC, Thain J, Deans HG, Ritchie LD, Rawles JM, Squair JL. Secondary prevention clinics for coronary heart disease: randomised trial of effect on health. *British Medical Journal* 1998;316(7142):1434-7.
30. Carlsson R. Serum cholesterol, lifestyle, working capacity and quality of life in patients with coronary artery disease. Experiences from a hospital-based secondary prevention programme. *Scandinavian cardiovascular journal Supplement* 1998;50:1-20.
31. Fattirolli F, Cartei A, Burgisser C, Mottino G, Del Lungo F, Oldridge N, et al. Aims, design and enrollment rate of the Cardiac Rehabilitation in Advanced Age (CR-AGE) randomized, controlled trial. *Aging* 1998;10(5):368-76.
32. Jitraphai C, Kantaratanakul V. Rehabilitation in uncomplicated myocardial infarction at Ramathibodi Hospital: 5 years follow-up. *Journal of the Medical Association of Thailand* 1998;81(4):288-91.
33. Jolly K, Bradley F, Sharp S, Smith H, Mant D. Follow-up care in general practice of patients with myocardial infarction or angina pectoris: initial results of the SHIP trial. Southampton Heart Integrated Care Project. *Family practice* 1998;15(6):548-55.
34. Nahhas GT, Bouffard RA, Hills EE, Moretti JA, Tilkemeier PL. Structured vs. non structured cardiac rehabilitation after coronary artery bypass surgery: An outcome-based analysis. *Journal of the American College of Cardiology* 1998;31(2):171A.

35. Ornish D, Scherwitz LW, Billings JH, Gould L, Merritt TA, Sparler S, et al. Intensive Lifestyle Changes for Reversal of Coronary Heart Disease. *JAMA, Journal of the American Medical Association* 1998;280:2001-7
36. Ornish D. Avoiding revascularization with lifestyle changes: The multicenter lifestyle demonstration project. 1998;82:72T-6T;  
<http://ovidsp.ovid.com/ovidweb.cgi?T=JS&PAGE=reference&D=emed4&NEWS=N&AN=1999005410>.
37. Walters J, Schwartz CF, Monaghan H, Watts J, Shlafer GJ, Deeb GM, et al. Long-term outcome following case management after coronary artery bypass surgery. *Journal of cardiac surgery* 1998;13(2):123-8.
38. Stahle A, Mattsson E, Ryden L, Uden A, Nordlander R. Improved physical fitness and quality of life following training of elderly patients after acute coronary events. A 1 year follow-up randomized controlled study. *European heart journal* 1999;20(20):1475-84.
39. Ma H, Liao X, Dong Y. Effects of early rehabilitation program on AMI patients. *Chinese Journal of Cardiology*. 1999;27((Ma, Liao, Dong) First Affiliated Hospital, Sun Yat-sen Univ. of Med. Sciences, Guangzhou 510080, China):213-5;  
<http://ovidsp.ovid.com/ovidweb.cgi?T=JS&PAGE=reference&D=emed4&NEWS=N&AN=1999275577>.
40. Lisspers J, Sundin O, Hofman-Bang C, Nordlander R, Nygren A, Ryden L, et al. Behavioral effects of a comprehensive, multifactorial program for lifestyle change after percutaneous transluminal coronary angioplasty: a prospective, randomized controlled study. *Journal of psychosomatic research* 1999;46(2):143-54.
41. Jolly K, Bradley F, Sharp S, Smith H, Thompson S, Kinmonth AL, et al. Randomised controlled trial of follow up care in general practice of patients with myocardial infarction and angina: final results of the Southampton heart integrated care project (SHIP). The SHIP Collaborative Group. *British Medical Journal* 1999;318(7185):706-11.
42. Johnston M, Foulkes J, Johnston DW, Pollard B, Gudmundsdottir H. Impact on patients and partners of inpatient and extended cardiac counseling and rehabilitation: a controlled trial. *Psychosomatic medicine* 1999;61(2):225-33.
43. Hofman-Bang C, Lisspers J, Nordlander R, Nygren A, Sundin O, Ohman A, et al. Two-year results of a controlled study of residential rehabilitation for patients treated with percutaneous transluminal coronary angioplasty. A randomized study of a multifactorial programme. *European heart journal* 1999;20(20):1465-74.
44. Dugmore LD, Tipson RJ, Phillips MH, Flint EJ, Stentiford NH, Bone MF, et al. Changes in cardiorespiratory fitness, psychological wellbeing, quality of life, and vocational status following a 12 month cardiac exercise rehabilitation programme. *Heart* 1999;81(4):359-66.
45. Bethell HJN, Turner SC, Mullee MA. Cardiac rehabilitation in the community: 11 year follow-up after a randomized controlled trial. *Coronary Health Care* 1999;3(4):183-8
46. Wallner S, Watzinger N, Lindschinger M, Smolle KH, Toplak H, Eber B, et al. Effects of intensified lifestyle modification on the need for further revascularization after coronary angioplasty United Kingdom: Blackwell Publishing Ltd.; 1999 [5:[372-9]. Available from:  
<http://ovidsp.ovid.com/ovidweb.cgi?T=JS&PAGE=reference&D=emed4&NEWS=N&AN=1999158785>.
47. van Dixhoorn JJ, Duivenvoorden HJ. Effect of relaxation therapy on cardiac events after myocardial infarction: a 5-year follow-up study. *Journal of cardiopulmonary rehabilitation* 1999;19(3):178-85.
48. Takahashi H, Saitoh S, Takagi S, Shimamoto K. [Prognosis predictor of chronic-stage acute myocardial infarction]. *Nihon Ronen Igakkai zasshi Japanese journal of geriatrics*. 1999;36(10):721-9.
49. Allison TG, Farkouh ME, Smars PA, Evans RW, Squires RW, Gabriel SE, et al. Management of coronary risk factors by registered nurses versus usual care in patients with unstable angina pectoris (a chest pain evaluation in the emergency room [CHEER] substudy). *The American journal of cardiology* 2000;86(2):133-8.
50. Epstein AM, Goss R. Cardiac rehabilitation after CABG surgery - Effects on health status outcomes. *J Invest Med* 2000;48(1):66A-A.

51. Goss JR, Epstein A, Maynard C. Effects of cardiac rehabilitation on self-reported health status after coronary artery bypass surgery. *Journal of cardiopulmonary rehabilitation* 2002;22(6):410-7.
52. Fridlund B. Self-rated health in women after their first myocardial infarction: a 12-month comparison between participation and nonparticipation in a cardiac rehabilitation programme. *Health care for women international* 2000;21(8):727-38.
53. Hata R, Motohara S, Tuji T, Komori H, Kosuga K, Hsu YS, et al. Beneficial effects of comprehensive cardiac rehabilitation and exercise training programs on ventricular arrhythmia in patients with post myocardial infarction. *Circulation* 2000;102(18):822.
54. Naughton J, Dorn J, Imamura D. Outcomes measurement in cardiac rehabilitation: the National Exercise and Heart Disease Project. *Journal of Rehabilitation Outcomes Measurement* 2000;4(4):64-75.
55. Pater C, Ditlef Jacobsen C, Rollag A, Sandvik L, Erikssen J, Karin Kogstad E. Design of a randomized controlled trial of comprehensive rehabilitation in patients with myocardial infarction, stabilized acute coronary syndrome, percutaneous transluminal coronary angioplasty or coronary artery bypass grafting: Akershus Comprehensive Cardiac Rehabilitation Trial (the CORE Study). *Current controlled trials in cardiovascular medicine* 2000;1(3):177-83.
56. Steffen-Batey L, Nichaman MZ, Goff DC, Frankowski RF, Hanis CL, Ramsey DJ, et al. Change in level of physical activity and risk of all-cause mortality or reinfarction - The Corpus Christi Heart Project. *Circulation* 2000;102(18):2204-9.
57. Toobert DJ, Glasgow RE, Radcliffe JL. Physiologic and related behavioral outcomes from the Women's Lifestyle Heart Trial. *Annals of behavioral medicine* 2000;22(1):1-9.
58. Baessler A, Hengstenberg C, Holmer S, Fischer M, Mayer B, Hubauer U, et al. Long-term effects of in-hospital cardiac rehabilitation on the cardiac risk profile. A case-control study in pairs of siblings with myocardial infarction. *European heart journal* 2001;22(13):1111-8.
59. Belardinelli R, Paolini I, Cianci G, Piva R, Georgiou D, Purcaro A. Exercise training intervention after coronary angioplasty: the ETICA trial. *Journal of the American College of Cardiology* 2001;37(7):1891-900.
60. Denollet J, Brutsaert DL. Reducing emotional distress improves prognosis in coronary heart disease: 9-year mortality in a clinical trial of rehabilitation. *Circulation* 2001;104(17):2018-23.
61. Fonarow GC, Gawlinski A, Moughrabi S, Tillisch JH. Improved treatment of coronary heart disease by implementation of a Cardiac Hospitalization Atherosclerosis Management Program (CHAMP). *The American journal of cardiology* 2001;87(7):819-22.
62. Hedback B, Perk J, Hornblad M, Ohlsson U. Cardiac rehabilitation after coronary artery bypass surgery: 10-year results on mortality, morbidity and readmissions to hospital. *Journal of cardiovascular risk* 2001;8(3):153-8.
63. Higgins HC, Hayes RL, McKenna KT. Rehabilitation outcomes following percutaneous coronary interventions (PCI). *Patient education and counseling* 2001;43(3):219-30
64. Whellan DJ, Shaw LK, Bart BA, Kraus WE, Califf RM, O'Connor CM. Cardiac rehabilitation and survival in patients with left ventricular systolic dysfunction. *American heart journal* 2001;142(1):160-6.
65. Sharma R, McLeod AA. Cardiac rehabilitation after coronary artery bypass graft surgery: Its effect on ischaemia, functional capacity, and a multivariate index of prognosis United Kingdom: Churchill Livingstone; 2001 [4:[189-93]. Available from: <http://ovidsp.ovid.com/ovidweb.cgi?T=JS&PAGE=reference&D=emed5&NEWS=N&AN=2002089919>.
66. Buchwalsky G, Buchwalsky R, Held K. [Long-term effects of rehabilitation of an outpatient "heart group". A case control study]. *Zeitschrift fur Kardiologie* 2002;91(2):139-46.
67. Desmarais PL. Q wave versus non-Q wave myocardial infarction after cardiac rehabilitation: morbidity and mortality: University of Massachusetts Lowell; 2002.
68. Hall JP, Wiseman VL, King MT, Ross DL, Kovoor P, Zecchin RP, et al. Economic evaluation of a randomised trial of early return to normal activities versus cardiac rehabilitation after acute myocardial infarction. *Heart, lung & circulation* 2002;11(1):10-8.



69. Kavanagh T, Mertens DJ, Hamm LF, Beyene J, Kennedy J, Corey P, et al. Prediction of long-term prognosis in 12 169 men referred for cardiac rehabilitation. *Circulation* 2002;106(6):666-71.
70. La Rovere MT, Bersano C, Gnemmi M, Specchia G, Schwartz PJ. Exercise-induced increase in baroreflex sensitivity predicts improved prognosis after myocardial infarction United States: Lippincott Williams and Wilkins; 2002 [8:[945-9]. Available from: <http://ovidsp.ovid.com/ovidweb.cgi?T=JS&PAGE=reference&D=emed5&NEWS=N&AN=2002303901>.
71. Oldridge N, Perkins A, Marchionni N, Fumagalli S, Fattiroli F, Guyatt G. Number needed to treat in cardiac rehabilitation. *Journal of cardiopulmonary rehabilitation* 2002;22(1):22-30.
72. Warren TF. Socioeconomic status, gender, and social support as predictors of mortality 10 years after cardiac rehabilitation: Massachusetts School of Professional Psychology; 2002.
73. Winberg B, Fridlund B. Self-reported behavioural and medical changes in women after their first myocardial infarction: a 4-year comparison between participation and non-participation in a cardiac rehabilitation programme. *European journal of cardiovascular nursing* 2002;1(2):101-7.
74. Wright DJ, Williams SG, Riley R, Marshall P, Tan LB. Is early, low level, short term exercise cardiac rehabilitation following coronary bypass surgery beneficial? A randomised controlled trial. *Heart* 2002;88(1):83-4.
75. Afrasiabi A, Toofan M, Pirzad L, Hassanzadeh S, Pirzad H. The effects of cardiac rehabilitation in patients with coronary artery disease. *Saudi medical journal* 2003;24(10):1145-8.
76. Aldana SG, Whitmer WR, Greenlaw R, Avins AL, Salberg A, Barnhurst M, et al. Cardiovascular risk reductions associated with aggressive lifestyle modification and cardiac rehabilitation. *Heart & lung : the journal of critical care* 2003;32(6):374-82.
77. Chiashi K. Clinical significance of long-term exercise in ischemic heart disease patients Japan: Medical Society of Toho University; 2003 [2:[154-63]. Available from: <http://ovidsp.ovid.com/ovidweb.cgi?T=JS&PAGE=reference&D=emed6&NEWS=N&AN=2003190500>.
78. Frenn M. The benefits of nurse led secondary prevention clinics for coronary heart disease continued after 4 years. *Evidence Based Nursing*. 2003;6(4):123; <http://www.redi-bw.de/db/ebSCO.php/search.ebSCOhost.com/login.aspx%3fdirect%3dtrue%26db%3dcin20%26AN%3d2004073600%26site%3dehost-live>.
79. ISRCTN72884263. The Birmingham Rehabilitation Uptake Maximisation Study (BRUM). Home-based versus hospital-based cardiac rehabilitation in a multi-ethnic population: cost-effectiveness and patient adherence. <http://isrctn.org/ISRCTN72884263>. 2003.
80. Johansen S, Baumbach LA, Jorgensen T, Willaing I. [The effect of psychosocial rehabilitation after acute myocardial infarction. A randomized controlled trial]. *Ugeskrift for laeger* 2003;165(34):3229-33.
81. Marchionni N, Fattiroli F, Fumagalli S, Oldridge N, Del Lungo F, Morosi L, et al. Improved exercise tolerance and quality of life with cardiac rehabilitation of older patients after myocardial infarction: results of a randomized, controlled trial. *Circulation* 2003;107(17):2201-6.
82. Murchie P, Campbell NC, Ritchie LD, Simpson JA, Thain J. Secondary prevention clinics for coronary heart disease: four year follow up of a randomised controlled trial in primary care. *British Medical Journal* 2003;326(7380):84.
83. Pasquali SK, Alexander KP, Coombs LP, Lytle BL, Peterson ED. Effect of cardiac rehabilitation on functional outcomes after coronary revascularization. *American heart journal* 2003;145:445-51.
84. Sundin O, Lisspers J, Hofman-Bang C, Nygren A, Ryden L, Ohman A. Comparing multifactorial lifestyle interventions and stress management in coronary risk reduction. *International journal of behavioral medicine*. 2003;10(3):191-204.
85. Vitcenda M. The Wisconsin outcomes experience: Baseline outcomes of the WISCVPR web-based outcomes project United States: Lippincott Williams and Wilkins; 2003 [4:[290-8]. Available from: <http://ovidsp.ovid.com/ovidweb.cgi?T=JS&PAGE=reference&D=emed6&NEWS=N&AN=2003319629>.
86. Vestfold Heartcare Study Group V. Influence on lifestyle measures and five-year coronary risk by a comprehensive lifestyle intervention programme in patients with coronary heart disease. *European Journal of Cardiovascular Prevention and Rehabilitation* 2003;10:429 - 37.

87. Young W, Rewa G, Goodman SG, Jaglal SB, Cash L, Lefkowitz C, et al. Evaluation of a community-based inner-city disease management program for postmyocardial infarction patients: a randomized controlled trial. *Can Med Assoc J* 2003;169(9):905-10.
88. Ballegaard S, Borg E, Karpatschhof B, Nyboe J, Johannessen A. Long-term effects of integrated rehabilitation in patients with advanced angina pectoris: a nonrandomized comparative study. *Journal of alternative and complementary medicine (New York, NY)*. 2004;10(5):777-83.
89. Hambrecht R, Walther C, Mobius-Winkler S, Gielen S, Linke A, Conradi K, et al. Percutaneous coronary angioplasty compared with exercise training in patients with stable coronary artery disease: a randomized trial. *Circulation* 2004;109(11):1371-8.
90. ISRCTN74601515. Short-term and long-term effect of a DANish hospital based comprehensive cardiac REHABilitation programme (The DANREHAB study). 2004; <http://isrctn.org/ISRCTN74601515>.
91. Jiang X. The effect of a nurse-led cardiac rehabilitation programme on patients with coronary heart disease in Chengdu, China: Hong Kong Polytechnic University (People's Republic of China); 2004.
92. Kotseva K, Wood DA, De Bacquer D, Heidrich J, De Backer G. Cardiac rehabilitation for coronary patients: lifestyle, risk factor and therapeutic management. Results from the EUROASPIRE II survey. *Eur Heart J Suppl* 2004;6(J):J17-J26.
93. Murchie P, Campbell NC, Ritchie LD, Deans HG, Thain J. Effects of secondary prevention clinics on health status in patients with coronary heart disease: 4 year follow-up of a randomized trial in primary care. *Family practice* 2004;21(5):567-74.
94. Piestrzeniewicz K, Navarro-Kuczborska N, Bolinska H, Jegier A, Maciejewski M. [The impact of comprehensive cardiac rehabilitation in patients up to 55 years old after acute myocardial infarction treated with primary coronary intervention]. *Polskie Archiwum Medycyny Wewnetrznej* 2004;111(3):309-17.
95. Sundararajan V, Bunker SJ, Begg S, Marshall R, McBurney H. Attendance rates and outcomes of cardiac rehabilitation in Victoria, 1998. *The Medical journal of Australia* 2004;180(6):268-71.
96. Witt BJ, Jacobsen SJ, Weston SA, Killian JM, Meverden RA, Allison TG, et al. Cardiac rehabilitation after myocardial infarction in the community. *Journal of the American College of Cardiology* 2004;44:988-96.
97. Yu CM, Lau CP, Chau J, McGhee S, Kong SL, Cheung BM, et al. A short course of cardiac rehabilitation program is highly cost effective in improving long-term quality of life in patients with recent myocardial infarction or percutaneous coronary intervention. *Archives of physical medicine and rehabilitation* 2004;85(12):1915-22.
98. Austin J, Williams R, Ross L, Moseley L, Hutchison S. Randomised controlled trial of cardiac rehabilitation in elderly patients with heart failure. *European journal of heart failure* 2005;7(3):411-7.
99. Briffa TG, Eckermann SD, Griffiths AD, Harris PJ, Heath MR, Freedman SB, et al. Cost-effectiveness of rehabilitation after an acute coronary event: a randomised controlled trial. *The Medical journal of Australia* 2005;183(9):450-5.
100. Dendale P, Berger J, Hansen D, Vaes J, Benit E, Weymans M. Cardiac rehabilitation reduces the rate of major adverse cardiac events after percutaneous coronary intervention Netherlands: Elsevier; 2005 [2:113-6; <http://ovidsp.ovid.com/ovidweb.cgi?T=JS&PAGE=reference&D=emed7&NEWS=N&AN=2005232734>].
101. Lisspers J, Sundin O, Ohman A, Hofman-Bang C, Ryden L, Nygren A. Long-term effects of lifestyle behavior change in coronary artery disease: effects on recurrent coronary events after percutaneous coronary intervention. *Health psychology* 2005;24(1):41-8.
102. Maroto Montero JM, Artigao Ramirez R, Morales Duran MD, de Pablo Zarzosa C, Abreira V. [Cardiac rehabilitation in patients with myocardial infarction: a 10-year follow-up study]. *Revista espanola de cardiologia* 2005;58(10):1181-7.
103. Raftery JP, Yao GL, Murchie P, Campbell NC, Ritchie LD. Cost effectiveness of nurse led secondary prevention clinics for coronary heart disease in primary care: follow up of a randomized controlled trial. *British Medical Journal* 2005;330:707 - 10.

104. Sinclair AJ, Conroy SP, Davies M, Bayer AJ. Post-discharge home-based support for older cardiac patients: a randomised controlled trial. *Age and ageing* 2005;34(4):338-43.
105. Zwisler AD, Schou L, Soja AM, Bronnum-Hansen H, Gluud C, Iversen L, et al. A randomized clinical trial of hospital-based, comprehensive cardiac rehabilitation versus usual care for patients with congestive heart failure, ischemic heart disease, or high risk of ischemic heart disease (the DANREHAB trial)--design, intervention, and population. *American heart journal* 2005;150(5):899.
106. Zwisler AD, Soja AM, Rasmussen S, Frederiksen M, Abedini S, Appel J, et al. Hospital-based comprehensive cardiac rehabilitation versus usual care among patients with congestive heart failure, ischemic heart disease, or high risk of ischemic heart disease: 12-month results of a randomized clinical trial. *American heart journal* 2008;155(6):1106-13.
107. Bhaskaran A, Siegel RM, Sargent T, Cool J, Johnson J, Snay S, et al. Impact of cardiac rehabilitation on the clinical course of coronary heart disease in post-CABG women. *European heart journal* 2006;27:254.
108. Herdy AH, Villa A, Marcchi PL, Collaco J, Tavares C, Ribeiro JP. In-hospital preoperative and postoperative cardiopulmonary rehabilitation improve outcomes after coronary artery bypass surgery: a randomized controlled trial. *European heart journal*. 2006;27:444 (abstr).
109. Kappagoda CT, Ma A, Cort DA, Paumer L, Lucus D, Burns J, et al. Cardiac event rate in a lifestyle modification program for patients with chronic coronary artery disease. *Clinical cardiology* 2006;29(7):317-21.
110. Kovoor P, Lee AK, Carrozzi F, Wiseman V, Byth K, Zecchin R, et al. Return to full normal activities including work at two weeks after acute myocardial infarction. *The American journal of cardiology* 2006;97(7):952-8.
111. Lear SA, Spinelli JJ, Linden W, Brozic A, Kiess M, Frohlich JJ, et al. The Extensive Lifestyle Management Intervention (ELMI) after cardiac rehabilitation: a 4-year randomized controlled trial. *American heart journal* 2006;152(2):333-9.
112. Soerensen C, Mortensen OS, Olsen LF, Larsen ML. Impact of cardiac rehabilitation on three-year mortality after STEMI. *European heart journal* 2006;27:445 (abstr).
113. Viswanathan K, Artis N, Bailey K, Morrell C, Das R, Kilcullen N, et al. Referral for cardiac rehabilitation after acute coronary syndrome reduces long-term mortality. *European heart journal* 2006;27:590-1.
114. Zhang YM, Sun HX. Influence of early rehabilitative exercise in patients with myocardial infarction China: *Journal of Clinical Rehabilitative Tissue Engineering Research* 2006;24:164-6. Available from: <http://ovidsp.ovid.com/ovidweb.cgi?T=JS&PAGE=reference&D=emed7&NEWS=N&AN=2006393554>.
115. Carroll DL, Rankin SH, Cooper BA. The effects of a collaborative peer advisor/advanced practice nurse intervention: cardiac rehabilitation participation and rehospitalization in older adults after a cardiac event. *The Journal of cardiovascular nursing* 2007;22(4):313-9.
116. Hua ST, Hsu CL, Kau LY, Huang HY, Chen JC, Tsai WJ, et al. The cost-effectiveness analysis of phase II cardiac rehabilitation in patients underwent CABG surgery. *International journal of cardiology* 2007;122:117 (abstr.)
117. Jiang X, Sit JW, Wong TK. A nurse-led cardiac rehabilitation programme improves health behaviours and cardiac physiological risk parameters: evidence from Chengdu, China. *Journal of clinical nursing* 2007;16(10):1886-97.
118. Macchi C, Fattirolli F, Lova RM, Conti AA, Luisi ML, Intini R, et al. Early and late rehabilitation and physical training in elderly patients after cardiac surgery. *American journal of physical medicine & rehabilitation* 2007;86(10):826-34.
119. Merenich JA, Olson KL, Delate T, Rasmussen J, Helling DK, Ward DG. Mortality reduction benefits of a comprehensive cardiac care program for patients with occlusive coronary artery disease. *Pharmacotherapy* 2007;27(10):1370-8.
120. Suaya JA, Shepard DS, Normand SL, Ades PA, Prottas J, Stason WB. Use of cardiac rehabilitation by Medicare beneficiaries after myocardial infarction or coronary bypass surgery. *Circulation* 2007;116(15):1653-62

121. Batista IBI, Fernandez HFH, Berro MBM, Lipszyc FIF, Bonorino JBJ, Pastori LPL, et al. Impact of a supervised exercise rehabilitation program on secondary prevention goals after acute coronary syndromes. *Circulation* 2008;118(12):E267 (abstr.).
122. Canyon S, Meshgin N. Cardiac rehabilitation: reducing hospital readmissions through community based programs. *Australian family physician* 2008;37(7):575-7.
123. Delaney EK, Murchie P, Lee AJ, Ritchie LD, Campbell NC. Secondary prevention clinics for coronary heart disease: a 10-year follow-up of a randomised controlled trial in primary care. *Heart* 2008;94(11):1419-23.
124. Dendale P, Hansen D, Berger J, Lamotte M. Long-term cost-benefit ratio of cardiac rehabilitation after percutaneous coronary intervention. *Acta cardiologica* 2008;63(4):451-6.
125. Giannuzzi P, Temporelli PL, Marchioli R, Maggioni AP, Balestroni G, Ceci V, et al. Global secondary prevention strategies to limit event recurrence after myocardial infarction: results of the GOSPEL study, a multicenter, randomized controlled trial from the Italian Cardiac Rehabilitation Network. *Archives of internal medicine* 2008;168(20):2194-204.
126. Herdy AH, Marcchi PL, Vila A, Tavares C, Collaco J, Niebauer J, et al. Pre- and postoperative cardiopulmonary rehabilitation in hospitalized patients undergoing coronary artery bypass surgery: a randomized controlled trial. *American journal of physical medicine & rehabilitation* 2008;87(9):714-9.
127. Huang Y, Zhang R, Culler SD, Kutner NG. Costs and effectiveness of cardiac rehabilitation for dialysis patients following coronary bypass. *Kidney international* 2008;74(8):1079-84.
128. Kummel M, Vahlberg T, Ojanlatva A, Karki R, Mattila T, Kivela SL. Effects of an intervention on health behaviors of older coronary artery bypass (CAB) patients. *Archives of gerontology and geriatrics* 2008;46(2):227-44.
129. Naser A, Shahamfar J, Kumar GV, Daga MK, Hadi HS, Saeed D, et al. Cardiac risk factor changes through an intensive multifactorial life style modification program in CHD patients: results from a two year follow up. *Journal of Biological Sciences* 2008; 8(2):248-57.  
<http://onlineibrary.wiley.com/o/cochrane/clcentral/articles/641/CN-00708641/frame.html>.
130. Silva RCe, Pellanda L, Portal V, Maciel P, Furquim A, Schaan B. Transdisciplinary approach to the follow-up of patients after myocardial infarction. *Clinics*. 63(4):489-96.
131. Cortes OL, Villar JC, Devereaux PJ, DiCenso A. Early mobilisation for patients following acute myocardial infarction: a systematic review and meta-analysis of experimental studies. *International journal of nursing studies* 2009;46(11):1496-504.
132. Edstrom-Pluss C, Billing E, Held C, Henriksson P, Kiessling A, Rydell Karlsson M, et al. Long-term beneficial effects of an expanded cardiac rehabilitation after an acute myocardial infarction or coronary artery by-pass grafting: A five year follow-up of a randomized controlled study: Oxford University Press; 2009 [75-6; (abstr.)]  
<http://ovidsp.ovid.com/ovidweb.cgi?T=JS&PAGE=reference&D=emed9&NEWS=N&AN=70353398>].
133. Giallauria F, Lucci R, D'Agostino M, Vitelli A, Maresca L, Mancini M, et al. Two-year multicomprehensive secondary prevention program: favorable effects on cardiovascular functional capacity and coronary risk profile after acute myocardial infarction. *Journal of cardiovascular medicine* 2009;10(10):772-80.
134. Jolly K, Lip GY, Taylor RS, Raftery J, Mant J, Lane D, et al. The Birmingham Rehabilitation Uptake Maximisation study (BRUM): a randomised controlled trial comparing home-based with centre-based cardiac rehabilitation. *Heart* 2009;95(1):36-42.
135. King M, Lichtman S, Dittmer J. Descriptive analysis of post acute inpatient cardiac rehabilitation in an inpatient rehabilitation facility: Lippincott Williams and Wilkins; 2009 [4:[267-8 (abstr.);]  
<http://ovidsp.ovid.com/ovidweb.cgi?T=JS&PAGE=reference&D=emed9&NEWS=N&AN=70004707>].
136. Lafitte M, Pradeau V, Leroux L, Richeboeuf V, Tastet S, Boulon C, et al. Efficacy over time of a short overall atherosclerosis management programme on the reduction of cardiovascular risk in patients after an acute coronary syndrome. *Archives of cardiovascular diseases* 2009;102(1):51-8.

137. Hammill BG, Curtis LH, Schulman KA, Whellan DJ. Relationship Between Cardiac Rehabilitation and Long-Term Risks of Death and Myocardial Infarction Among Elderly Medicare Beneficiaries. *Circulation* 2010;121(1):63-70.
138. Hansen D, Dendale P, Raskin A, Schoonis A, Berger J, Vlassak I, et al. Long-term effect of rehabilitation in coronary artery disease patients: randomized clinical trial of the impact of exercise volume. *Clinical rehabilitation* 2010;24(4):319-27.
139. NCT01075867. Multi-dimensional Prevention Program After Acute Coronary Syndrome (ELIPS) (SPUM-ACS- SP1). 2010; <http://clinicaltrials.gov/show/NCT01075867>.
140. Onishi T, Shimada K, Sato H, Seki E, Watanabe Y, Sunayama S, et al. Effects of phase III cardiac rehabilitation on mortality and cardiovascular events in elderly patients with stable coronary artery disease. *Circulation journal* 2010;74(4):709-14.
141. Silberman A, Banthia R, Estay IS, Kemp C, Studley J, Hareras D, et al. The effectiveness and efficacy of an intensive cardiac rehabilitation program in 24 sites. *American journal of health promotion* 2010;24(4):260-6
142. Soga Y, Yokoi H, Ando K, Shirai S, Sakai K, Kondo K, et al. Safety of early exercise training after elective coronary stenting in patients with stable coronary artery disease. *European journal of cardiovascular prevention and rehabilitation* 2010;17(2):230-4.
143. Boyden TF, Reid KJ, Buchanan DM, Masoudi F, Wang TY, Spertus J, et al. Association between cardiac rehabilitation and mortality and rehospitalization following acute myocardial infarction. *Circulation*. 2011;124; 21 SUPPL 1; (abstr); <http://ovidsp.ovid.com/ovidweb.cgi?T=JS&PAGE=reference&D=emed10&NEWS=N&AN=70618157>.
144. Doll JA, Hellkamp A, Thomas L, Ho PM, Kontos MC, Whooley MA, et al. Effectiveness of cardiac rehabilitation among older patients after acute myocardial infarction. *Am Heart J*. 2015;170(5):855-64.
145. Gulliksson M, Burell G, Vessby B, Lundin L, Toss H, Svardsudd K. Randomized controlled trial of cognitive behavioral therapy vs standard treatment to prevent recurrent cardiovascular events in patients with coronary heart disease: Secondary Prevention in Uppsala Primary Health Care project (SUPRIM). *Archives of internal medicine* 2011;171(2):134-40.
146. JPRN-UMIN000005177. Japanese prospective multicenter study on outpatient cardiac rehabilitation after the percutaneous coronary intervention. <http://www.umin.ac.jp/ctr/index.htm>. 2011.
147. Lam G, Snow R, Shaffer L, La Londe M, Spencer K, Caulin-Glaser T. The effect of a comprehensive cardiac rehabilitation program on 60-day hospital readmissions after an acute myocardial infarction. *Journal of the American College of Cardiology*. 2011;57; 14 SUPPL 1 (abstr); [http://ovidsp.ovid.com/ovidweb.cgi?T=JS&PAGE=reference&D=emed10&NEWS=N&AN=70400274\(\(Lam\)\)](http://ovidsp.ovid.com/ovidweb.cgi?T=JS&PAGE=reference&D=emed10&NEWS=N&AN=70400274((Lam)))
148. Lewinter C, Bland JMB, Crouch SC, Doherty PD, Lewin BL, Hall ASH, et al. Temporal evaluation (1995-2003) of referral and long-term survival from cardiac rehabilitation for acute myocardial infarction: Oxford University Press; 2011 [382 (abstr)]; <http://ovidsp.ovid.com/ovidweb.cgi?T=JS&PAGE=reference&D=emed10&NEWS=N&AN=70534479>].
149. Lewinter C, Bland JM, Crouch S, Doherty P, Lewin RJ, Kober L, et al. The effect of referral for cardiac rehabilitation on survival following acute myocardial infarction: a comparison survival in two cohorts collected in 1995 and 2003. *Eur J Prev Cardiol*; DOI 10.1177/2047487312469124. 2012.
150. Milani RV, Lavie CJ, Mehra MR, Ventura HO. Impact of Exercise Training and Depression on Survival in Heart Failure Due to Coronary Heart Disease. *Am J Cardiol* 2011;107(1):64-8.
151. Moreno-Palanco MA, Ibanez-Sanz P, Ciria-de Pablo C, Pizarro-Portillo A, Rodriguez-Salvanes F, Suarez-Fernandez C. Impact of comprehensive and intensive treatment of risk factors concerning cardiovascular mortality in secondary prevention: MIRVAS Study. *Revista espanola de cardiologia* 2011;64(3):179-85.
152. Piso B, Tuchler H, Gyimesi M, Kollmann I, Endel G, Wilbacher I, et al. [Outpatient cardiac phase III rehabilitation at a Viennese institution - retrospective cohort study]. *Wiener medizinische Wochenschrift* 2011;161(9-10):263-71.



153. Pluss CE, Billing E, Held C, Henriksson P, Kiessling A, Karlsson MR, et al. Long-term effects of an expanded cardiac rehabilitation programme after myocardial infarction or coronary artery bypass surgery: a five-year follow-up of a randomized controlled study. *Clinical rehabilitation* 2011;25(1):79-87.
154. Soga Y, Yokoi H, Amemiya K, Iwabuchi M, Nobuyoshi M. Safety and efficacy of exercise training after coronary stenting in patients with stable coronary artery disease. *Circulation journal* : 2011;75(10):2379-86.
155. Armstrong MJ, Sigal RJ, Hauer TL, Austford LD, Arena R, Aggarwal S, et al. Cardiac rehabilitation completion is associated with reduced mortality in diabetic subjects with coronary artery disease. *Circulation*. 2012;126, 21 SUPPL 1 (abstr); [http://ovidsp.ovid.com/ovidweb.cgi?T=JS&PAGE=reference&D=emed11&NEWS=N&AN=70955366\(\(Armstrong, Sigal, Martin\) Medicine, Univ of Calgary, Calgary, Canada\)](http://ovidsp.ovid.com/ovidweb.cgi?T=JS&PAGE=reference&D=emed11&NEWS=N&AN=70955366((Armstrong, Sigal, Martin) Medicine, Univ of Calgary, Calgary, Canada)).
156. Armstrong MJ, Sigal RJ, Arena R, Hauer TL, Austford LD, Aggarwal S, et al. Cardiac rehabilitation completion is associated with reduced mortality in patients with diabetes and coronary artery disease. *Diabetologia* 2015;58(4):691-8.
157. Martin BJ, Hauer T, Arena R, Austford LD, Galbraith PD, Lewin AM, et al. Cardiac rehabilitation attendance and outcomes in coronary artery disease patients. *Circulation* 2012;126(6):677-87.
158. Franklin BA. 2012 - Multifactorial cardiac rehabilitation did not reduce mortality or morbidity after acute myocardial infarction. *ACP journal club* 2012;156(7):1-.
159. West RR, Jones DA, Henderson AH. Rehabilitation after myocardial infarction trial (RAMIT): multi-centre randomised controlled trial of comprehensive cardiac rehabilitation in patients following acute myocardial infarction. *Heart* 2012;98(8):637-44.
160. Ghroubi S, Elleuch W, Abid L, Kammoun S, Elleuch MH. The effects of cardiovascular rehabilitation after coronary stenting, Apport de la readaptation cardiovasculaire dans les suites d'une angioplastie transluminale. *Annals of physical and rehabilitation medicine* 2012;55:e307 (abstr); <http://ovidsp.ovid.com/ovidweb.cgi?T=JS&PAGE=reference&D=emed10&NEWS=N&AN=70941499>.
161. Iliou MC, Andr R, Vedrenn G, Douar H, Zelle M, Furbe A, et al. Cardiac rehabilitation and long-term outcome after myocardial infarction. Real-world data from the french FAST-MI 2005 registry. *Circulation*. 2012;126; 21 SUPPL 1 (abstr); [http://ovidsp.ovid.com/ovidweb.cgi?T=JS&PAGE=reference&D=emed11&NEWS=N&AN=70959244\(\(Iliou\) Cardiology, Hopital Corentin Celton, Issy les Moulineaux, France\)](http://ovidsp.ovid.com/ovidweb.cgi?T=JS&PAGE=reference&D=emed11&NEWS=N&AN=70959244((Iliou) Cardiology, Hopital Corentin Celton, Issy les Moulineaux, France)).
162. Pouche M, Ruidavets JB, Iliou MC, Douard H, Lorgis L, Brunel P, et al. Cardiac rehabilitation and five-year mortality after an acute coronary syndrome: The 2005 French FAST-MI registry. *European heart journal*. 2013;34:657-8 (abstr);
163. Pouche M, Ruidavets JB, Ferrières J, Iliou MC, Douard H, Carrié D, et al. Cardiac rehabilitation and 5-year mortality after acute coronary syndromes: The 2005 French FAST-MI study. *Archives of Cardiovascular Diseases* 2015: DOI 10.1016/j.jacvd.2015.09.009
164. Kubilius R, Jasiukeviciene L, Grizas V, Kubiliene L, Jakubseviciene E, Vasiliauskas D. The impact of complex cardiac rehabilitation on manifestation of risk factors in patients with coronary heart disease. *Medicina* 2012;48(3):166-73.
165. Mayer-Beger W, Simic D, Mahmoodzad J, Burtscher R, Kohlmeyer M, Schwitalla B, et al. Efficacy of a long-term secondary prevention programme following inpatient cardiovascular rehabilitation on risk and health-related quality of life in a low-education cohort: a randomized controlled study. *Eur J Prev Cardiol* 2012;21(2):145-52.
166. Naranjo-Estupinan NF, Diaz-Quijano FA, Garcia RG. The influence of cardiac rehabilitation on acute myocardial infarction patients' readmission rate in Santander, Colombia. [Spanish]. *Revista de salud publica* 2012;14(5):831-41.
167. Ou HT, Balkrishnan R. Cost-effectiveness of cardiac rehabilitation program on patient medication adherence and hospitalization in medicaid population with acute myocardial infarction:

- Elsevier Ltd; 2012 [4:A120-1 (abstr);  
<http://ovidsp.ovid.com/ovidweb.cgi?T=JS&PAGE=reference&D=emed10&NEWS=N&AN=70763633>].
168. Parashar S, Spertus JA, Tang F, Bishop KL, Vaccarino V, Jackson CF, et al. Predictors of early and late enrollment in cardiac rehabilitation, among those referred, after acute myocardial infarction. *Circulation* 2012;126(13):1587-95.
169. Rangel I, Rocha A, Sousa C, Sousa A, Correia AS, Paiva M, et al. Compliance to a cardiac rehabilitation program: What benefits and prognosis impact? *European Journal of Heart Failure*, Supplement. 2012;11S220 (abstr);  
<http://ovidsp.ovid.com/ovidweb.cgi?T=JS&PAGE=reference&D=emed11&NEWS=N&AN=71191429>.
170. Rideout A, Lindsay G, Godwin J. Patient mortality in the 12 years following enrolment into a pre-surgical cardiac rehabilitation programme. *Clinical rehabilitation* 2012;26(7):642-7.
171. Suzuki T, Kohro T, Hayashi D, Yamazaki T, Nagai R. Frequency and impact of lifestyle modification in patients with coronary artery disease: The Japanese Coronary Artery Disease (JCAD) Study. *American heart journal* 2012;163(2):268-73.
172. Gambogi R, Baldizzoni M, Saona G, Niggemeyer A, Wald I, Nigro S, et al. Effectiveness of a secondary cardiovascular prevention program in Uruguay. *European journal of preventive cardiology* 2013;1:S47 (abstr); DOI <http://dx.doi.org/10.1177/2047487314530052>.
173. Hung RK, Al-Mallah MH, Whelton SP, Silverman MG, McEvoy JW, Martin SS, et al. High exercise capacity attenuates mortality risk associated with unrevascularized and revascularized coronary artery disease: The fit project. *Circulation* 2013;128, 22 (SUPPL); (abstr) AHA Scientific Sessions 2013.
174. Jorstad HT, Birgelen C, Alings AM, Liem A, Dantzig JM, Jaarsma W, et al. Effect of a nurse-coordinated prevention programme on cardiovascular risk after an acute coronary syndrome: main results of the RESPONSE randomised trial. *Heart* 2013; 99(19):[1421-30 pp.]. Available from: <http://onlinelibrary.wiley.com/o/cochrane/clcentral/articles/287/CN-00963287/frame.html>.
175. Kotseva K, Wood D, De Backer G, De Bacquer D, et al. Use and effects of cardiac rehabilitation in patients with coronary heart disease: results from the EUROASPIRE III survey. *European journal of preventive cardiology* 2013;20(5):817-26.
176. Lear SA, Singer J, Horvat D, Park JE, Bates J, Ignaszewski A. Randomized trial of a 'virtual' cardiac rehabilitation program delivered at a distance via the internet. *Circulation*. 2013;128 (22 SUPPL, abstr)
177. Longobardi G, Furgi G, Mazzella F, Francesco Cacciatore F. Protective effect on mortality of physical exercise in adult and elderly patient with cardiovascular disease. *European journal of preventive cardiology* 2013:S35 (abstr); DOI <http://dx.doi.org/10.1177/2047487314530052>.
178. Martin BJ, Arena R, Haykowsky M, Hauer T, Austford LD, Knudtson M, et al. Cardiovascular fitness and mortality after contemporary cardiac rehabilitation. *Mayo Clinic proceedings*. 2013;Mayo Clinic. 88:455-63.
179. Meisinger C, Stollenwerk B, Kirchberger I, Seidl H, Wende R, Kuch B, et al. Effects of a nurse-based case management compared to usual care among aged patients with myocardial infarction: results from the randomized controlled KORINNA study. *BMC geriatrics* 2013; 13:[115; DOI <http://dx.doi.org/10.1186/471-2318-13-115> pp.]. Available from: <http://onlinelibrary.wiley.com/o/cochrane/clcentral/articles/809/CN-00994809/frame.html>.
180. Mudrick DW, Shaffer L, Lalonde M, Ruhil A, Lam G, Hickerson J, et al. Cardiac rehabilitation participation reduces 90-day hospital readmissions after acute myocardial infarction or percutaneous coronary intervention. *Journal of the American College of Cardiology*. 2013;61 (abstr)  
<http://ovidsp.ovid.com/ovidweb.cgi?T=JS&PAGE=reference&D=emed11&NEWS=N&AN=71020781>.
181. Murphy BM, Worcester MU, Higgins RO, Elliott PC, Le Grande MR, Mitchell F, et al. Reduction in 2-year recurrent risk score and improved behavioral outcomes after participation in the "Beating Heart Problems" self-management program: results of a randomized controlled trial. *Journal of cardiopulmonary rehabilitation and prevention*. 2013;33(4):220-8.
182. Naci H, Ioannidis JPA. Comparative effectiveness of exercise and drug interventions on mortality outcomes: metaepidemiological study. *British Medical Journal*. 2013;347.

183. Panovsky R, Kukla P, Jancik J, Meluzin J, Dobsak P, Kincl V, et al. The prognostic effect of different types of cardiac rehabilitation in patients with coronary artery disease. *Acta cardiologica*. 2013;68(6):575-81.
184. Nicola Russo N, Compostella L, Vettore E, Setzu T, Zilio F, Bilato C, et al. Intensive, exercise based, cardiac rehabilitation immediately after an acute myocardial infarction in high risk patients: Impact on immediate and long-term prognosis. *European journal of preventive cardiology* 2013:S139 (abstr); DOI <http://dx.doi.org/10.1177/2047487314530052>.
185. Santaularia N, Caminal J, Arnau A, Perramon M, Montesinos J, Trape J, et al. Randomized clinical trial to evaluate the effect of a supervised exercise training program on readmissions in patients with myocardial ischemia: a study protocol. *BMC cardiovascular disorders* 2013; 13:[32; DOI <http://dx.doi.org/10.1186/471-2261-13-32> pp.]. Available from: <http://onlinelibrary.wiley.com/o/cochrane/clcentral/articles/113/CN-01048113/frame.html>.
186. Sobolev M, Prince DZ, Gao J, Taub C. Completion of cardiac rehabilitation reduces hospital admission rates in long term follow-up. *Circulation* 2013;127 (abstr); [http://ovidsp.ovid.com/ovidweb.cgi?T=JS&PAGE=reference&D=emed11&NEWS=N&AN=71026887\(\(Sobolev, Prince, Gao, Taub\) Montefiore Med Cntr, Bronx, NY, United States\)](http://ovidsp.ovid.com/ovidweb.cgi?T=JS&PAGE=reference&D=emed11&NEWS=N&AN=71026887((Sobolev, Prince, Gao, Taub) Montefiore Med Cntr, Bronx, NY, United States)).
187. Turkstra E, Hawkes AL, Oldenburg B, Scuffham PA. Cost-effectiveness of a coronary heart disease secondary prevention program in patients with myocardial infarction: results from a randomised controlled trial (ProActive Heart). *BMC cardiovascular disorders*. 2013;13(1):33; DOI 10.1186/471-2261-13-33
188. Vervueren PL, Bongard V, Arveiler D, Dallongeville J, Ruidavets JB, Wagner A, et al. Cardiovascular rehabilitation after a first acute coronary syndrome and the risk of recurrence and death in patients from the French MONICA registries. *Archives of Cardiovascular Diseases Supplements*. 2013;5 (1):82 (abstr); <http://ovidsp.ovid.com/ovidweb.cgi?T=JS&CSC=Y&NEWS=N&PAGE=fulltext&D=emed13&AN=72045393>.
189. ACTRN12614000284662. The Central Australian Heart Protection Study: A Randomised Trial of Nurse-Led, Family Based Secondary Prevention of Acute Coronary Syndromes 2014; <http://www.anzctr.org.au/ACTRN12614000284662.aspx>.
190. Alter DA, Franklin B, Ko DT, Austin PC, Lee DS, Oh PI, et al. Socioeconomic status, functional recovery, and long-term mortality among patients surviving acute myocardial infarction. *PLoS ONE [Electronic Resource]* 2014;8(6):e65130; DOI 10.1371/journal.pone.0065130.
191. Anderson LJ, Taylor RS. Cardiac rehabilitation for people with heart disease: an overview of Cochrane systematic reviews. *International journal of cardiology* 2014;177(2):348-61.
192. Cobo Gomez N, Romero Reyes MJ, Molano Casimiro FJ, Pastor Torres L. Impact of cardiac rehabilitation on mortality and cardiovascular events after percutaneous coronary intervention. *European Heart Journal*; <http://dxdoiorg/101093/eurheartj/ehu322>. 2014;35:57.
193. Dunlay SM, Pack QR, Thomas RJ, Killian JM, Roger VL. Participation in cardiac rehabilitation, readmissions, and death after acute myocardial infarction. *The American journal of medicine*. 2014;127(6):538-46.
194. Enrique Otero Chulian E, Fernandez Garcia P, Sanchez Millan P, Pajares Vinardell M, Gheroghe L, Chueca Gonzalez E, et al. Effect of cardiac rehabilitation in the rate of cardiovascular events in patients with ischemic heart disease. *European Journal of Preventive Cardiology*; <http://dxdoiorg/101177/2047487314534585>. 2014;1):S141.
195. Expósito-Tirado JA, Aguilera-Saborido A, López-Lozano AM, Vallejo-Carmona J, Praena-Fernández JM, Cano-Plasencia G, et al. Long-term total mortality and cardiovascular morbidity in patients with ischemic cardiac disease who completed a cardiac rehabilitation and secondary prevention program [Spanish]. *Rehabilitacion* 2014;48(4):210-8.
196. Kamath DY, Xavier D, Gupta R, Devereaux PJ, Sigamani A, Hussain T, et al. Rationale and design of a randomized controlled trial evaluating community health worker-based interventions for the secondary prevention of acute coronary syndromes in India (SPREAD). *American heart journal* 2014;168(5):690-7.



197. Kim SS, Lee S, Kim G, Kang SM, Ahn JA. Effects of a comprehensive cardiac rehabilitation program in patients with coronary heart disease in Korea. *Nursing & health sciences* 2014;16(4):476-82.
198. Kureshi F, Kennedy KF, Jones PG, Thomas RJ, Buchanan DM, Sharma P, et al. Association between cardiac rehabilitation participation and health status outcomes after acute myocardial infarction. *Circulation: Cardiovascular Quality and Outcomes*. 2014;7 (abstr)
199. Lewinter C, Bland JM, Crouch S, Doherty P, Lewin RJ, Kober L, et al. The effect of referral for cardiac rehabilitation on survival following acute myocardial infarction: A comparison survival in two cohorts collected in 1995 and 2003. *European journal of preventive cardiology*. 2014;21:163-71.
200. Lewinter C, Thygesen L, Doherty P, Kober L, Zwisler AD. Effectiveness of cardiac rehabilitation in HF patients: A long-term follow-up of the DANREHAB-trial. *European Journal of Heart Failure*; <http://dx.doi.org/10.1002/ejhf93> 4. 2014;16:60.
201. Lubinskaya E, Nikolaeva O. Cost-effectiveness of 2-year comprehensive cardiac rehabilitation program after coronary bypass surgery. *European Journal of Preventive Cardiology*; <http://dx.doi.org/10.1177/2047487314534585>. 2014;1:S74.
202. Martin BJ, Aggarwal S, Stone JA, Hauer T, Austford LD, Hemmelgarn B, et al. Cardiac rehabilitation improves outcomes in patients with acute heart failure post myocardial infarction: Analysis of a large, single-center cohort. *Experimental and clinical cardiology*. 2014;20:2206-37.
203. Maddison R, Rawstorn JC, Rolleston A, Whittaker R, Stewart R, Benatar J, et al. The remote exercise monitoring trial for exercise-based cardiac rehabilitation (REMOTE-CR): a randomised controlled trial protocol. *BMC Public Health* 2014;14:1236.
204. Antonio Ramirez Moreno A, Siles-Rubio JR, Nouredine-Lopez M, Munoz-Bellido J, Pera-Rojas C, Fernandez-Lopez L, et al. Compliance to a cardiac rehabilitation program provides benefits and prognosis impact. *European journal of preventive cardiology* 2014;1:S104; <http://dx.doi.org/10.1177/2047487314534582>.
205. Santoalha JM, Amorim H, Cadilha R, Rocha JA. Cardiac rehabilitation adherence as a determinant of cardiovascular disease burden after ACS. *PM & R* 2014;2:S83-S4; <http://dx.doi.org/10.1016/j.pmrj.2014.08.350>.
206. Sharma R, Norris C, Gyenes G, Wilson L, Bainey KR. Impact of cardiac rehabilitation on South Asians: Results from the Alberta provincial project for outcomes assessment in coronary heart disease (approach) registry. *Can J Cardiol*. 2014;1:S119-20 (abstr).
207. Bubnova M, Aronov D, Krasnitsky V, Novikova N. Effectiveness of physical rehabilitation in hypertensive patients after acute myocardial infarction treated with primary coronary intervention. *Journal of Hypertension* 2015;33:e136; DOI <http://dx.doi.org/10.1016/j.pmrj.2014.08.350>.
208. Chen HM, Liu CK, Chen HW, Shia BC, Chen M, Chung CH. Efficiency of rehabilitation after acute myocardial infarction. *Kaohsiung J Med Sci* 2015;31(7):351-7.
209. Chew DP, Astley CM, Luker H, Alprandi-Costa B, Hillis G, Chow CK, et al. A cluster randomized trial of objective risk assessment versus standard care for acute coronary syndromes: Rationale and design of the Australian GRACE Risk score Intervention Study (AGRIS). *Am Heart J* 2015;170(5):995-1004; DOI 10.16/j.ahj.2015.07.032OI
210. Colbert JD, Martin BJ, Haykowsky MJ, Hauer TL, Austford LD, Arena RA, et al. Cardiac rehabilitation referral, attendance and mortality in women. *European Journal of Preventive Cardiology* 2015;22(8):979-86.
211. Cobo Gomez N, Romero Reyes MJ, Picon Heras R, Escane Duarte P, Mora Pardo JA, Gonzalez Correa MJ, et al. Impact of a cardiac rehabilitation programme on mortality and cardiovascular events after a percutaneous coronary intervention in patients with multivessel disease and incomplete revascularization. *European Heart Journal* 2015;36:635; DOI <http://dx.doi.org/10.1093/eurheartj/ehv400>.
212. Cobo Gomez NN, Mora Pardo JA, Picon Heras R, Romero Reyes MJ, Escane Duarte P, Mera Romero M, et al. Cardiac rehabilitation in heart failure with reduced left ventricular ejection fraction due to ischaemic cardiomyopathy: Effect on all-cause mortality and cardiac mortality. *European Journal of Heart Failure*. 2015;17:355; DOI <http://dx.doi.org/10.1002/ejhf.277>.

213. Coll-Fernandez R, Coll R, Munoz-Torrero JF, Aguilar E, Ramon Alvarez L, Sahuquillo JC, et al. Supervised versus non-supervised exercise in patients with recent myocardial infarction. A propensity analysis. *Eur J Prev Cardiol*; DOI 10.1177/2047487315578443. 2015.
214. Deljanin Ilic M, Ilic S, Simonovic D, Kocic G, Pavlovic R, Stoickov V. Prognostic value of endothelial parameters changes during cardiac rehabilitation on recurrent chest pain in patients with coronary artery disease: 30 months follow up. *European Heart Journal* 2015;36:637; DOI <http://dx.doi.org/10.1093/eurheartj/ehv400>.
215. Gencer B, Carballo D, Auer R, Nanchen D, Raeber L, Matter CM, et al. Effect of a multi-dimensional secondary prevention program on cardiovascular events in patients hospitalized with acute coronary syndromes: A multicentric Swiss prospective trial. *European Heart Journal* 2015;36:1202; DOI <http://dx.doi.org/10.093/eurheartj/ehv402>.
216. Kadda O, Kotanidou A, Manginas A, Stavridis G, Nanas S, Panagiotakos DB. Lifestyle intervention and one-year prognosis of patients following open heart surgery: a randomised clinical trial. *Journal of Clinical Nursing*. 2015;24(11/12):1611-21
217. NCT02584192. Efficacy of Early Home-based Cardiac Rehabilitation Program for Patients After Acute Myocardial Infarction. 2015; <https://clinicaltrials.gov/show/NCT02584192>.
218. NTR5306. Effectiveness of currently available cardiac rehabilitation programmes from 8 European institutes in elderly patients. 2015; <http://www.trialregister.nl/trialreg/admin/rctview.asp?TC=5306>.
219. Romero Reyes MJ, Cobo Gomez N, Escane Duarte P, Picon Heras R, Guerola Segura R, Molano Casimiro FJ, et al. Effectiveness of cardiac rehabilitation in patients with type 2 diabetes mellitus after percutaneous coronary intervention. *European Heart Journal* 2015;36:517; <http://dx.doi.org/10.1093/eurheartj/ehv400>.
220. Marianela Sanchez Martinez M, Del Prado Diaz S, Dalmau Gonzalez-Gallarza R, Castro Conde A, Hernandez Munoz D, Vindel Martinez C, et al. Effects of cardiac rehabilitation in young patients after an acute coronary syndrome. *European Journal of Preventive Cardiology* 2015;1:S94; <http://dx.doi.org/10.1177/2047487315586743>.
221. Vataman EB, Grivenco AA, Filimon SS, Lisii DM, Morcov LG. Effect of long-term home based cardiac rehabilitation programme on readmission rate and mortality risk after coronary revascularization. *European Heart Journal* 2015;36:637 (abstr); DOI <http://dx.doi.org/10.1093/eurheartj/ehv400>.
222. Wang W, Jiang Y, He HG, Koh KW. A randomised controlled trial on the effectiveness of a home-based self-management programme for community-dwelling patients with myocardial infarction. *Eur J Cardiovasc Nurs*. 2015;DOI 10.1177/1474515115586904.
223. Boulay P, Prud'homme D. Health-care consumption and recurrent myocardial infarction after 1 year of conventional treatment versus short- and long-term cardiac rehabilitation. *Preventive medicine* 2004;38(5):586-93.
224. Norris CM, Jensen LA, Galbraith PD, Graham MM, Daub WD, Knudtson ML, et al. Referral rate and outcomes of cardiac rehabilitation after cardiac catheterization in a large Canadian city. *J Cardiopulmonary Rehabilitation* 2004;24:392-400.
225. Kutner NG, Zhang R, Huang Y, Herzog CA. Cardiac rehabilitation and survival of dialysis patients after coronary bypass. *Journal of the American Society of Nephrology, JASN*. 2006;17(4):1175-80.
226. Milani RV, Lavie CJ. Impact of cardiac rehabilitation on depression and its associated mortality. *The American journal of medicine* 2007;120(9):799-806.
227. Nielsen KM, Faergeman O, Foldspang A, Larsen ML. Cardiac rehabilitation: health characteristics and socio-economic status among those who do not attend. *European journal of public health* 2008;18(5):479-83.
228. Alter DA, Oh PI, Chong A. Relationship between cardiac rehabilitation and survival after acute cardiac hospitalization within a universal health care system. *European journal of cardiovascular prevention and rehabilitation* 2009;16(1):102-13.

229. Hansen D, Dendale P, Leenders M, Berger J, Raskin A, Vaes J, et al. Reduction of cardiovascular event rate: different effects of cardiac rehabilitation in CABG and PCI patients. *Acta cardiologica* 2009;64(5):639-44.
230. Suaya JA, Stason WB, Ades PA, Normand SL, Shepard DS. Cardiac rehabilitation and survival in older coronary patients. *Journal of the American College of Cardiology* 2009;54(1):25-33.
231. Junger C, Rauch B, Schneider S, Liebhart N, Rauch G, Senges J, et al. Effect of early short-term cardiac rehabilitation after acute ST-elevation and non-ST-elevation myocardial infarction on 1-year mortality. *Current medical research and opinion* 2010;26(4):803-11.
232. Goel K, Lennon RJ, Tilbury RT, Squires RW, Thomas RJ. Impact of cardiac rehabilitation on mortality and cardiovascular events after percutaneous coronary intervention in the community. *Circulation*. 2011;123(21):2344-52
233. Kim C, Kim DY, Moon CJ. Prognostic influences of cardiac rehabilitation in Korean acute myocardial infarction patients. *Annals of rehabilitation medicine* 2011;35(3):375-80.
234. Schwaab B, Waldmann A, Katalinic A, Sheikhzadeh A, Raspe H. In-patient cardiac rehabilitation versus medical care - a prospective multicentre controlled 12 months follow-up in patients with coronary heart disease. *European journal of cardiovascular prevention and rehabilitation* 2011;18(4):581-6.
235. Beauchamp A, Worcester M, Ng A, Murphy B, Tatoulis J, Grigg L, et al. Attendance at cardiac rehabilitation is associated with lower all-cause mortality after 14 years of follow-up. *Heart* 2013;99(9):620-5.
236. Lee HY, Kim JH, Kim BO, Byun YS, Cho S, Goh CW, et al. Regular exercise training reduces coronary restenosis after percutaneous coronary intervention in patients with acute myocardial infarction. *International journal of cardiology* 2013;167(6):2617-22.
237. Marzolini S, Leung YW, Alter DA, Wu G, Grace SL. Outcomes associated with cardiac rehabilitation participation in patients with musculoskeletal comorbidities. *European journal of physical and rehabilitation medicine* 2013;49:775-83.
238. Pack QR, Goel K, Lahr BD, Greason KL, Squires RW, Lopez-Jimenez F, et al. Participation in cardiac rehabilitation and survival after coronary artery bypass graft surgery: a community-based study. *Circulation* 2013;128(6):590-7.
239. Coll-Fernandez R, Coll R, Pascual T, Sanchez Munoz-Torrero JF, Sahuquillo JC, Manzano L, et al. Cardiac Rehabilitation and Outcome in Stable Outpatients With Recent Myocardial Infarction. *Archives of physical medicine and rehabilitation* 2014;95:322-9.
240. Prince DZ, Sobolev M, Gao J, Taub CC. Racial disparities in cardiac rehabilitation initiation and the effect on survival. *PM & R : the journal of injury, function, and rehabilitation* 2014;6(6):486-92.
241. Rauch B, Riemer T, Schwaab B, Schneider S, Diller F, Gohlke H, et al. Short-term comprehensive cardiac rehabilitation after AMI is associated with reduced 1-year mortality: results from the OMEGA study. *European journal of preventive cardiology* 2014;21(9):1060-9.
242. Goel K, Pack QR, Lahr B, Greason KL, Lopez-Jimenez F, Squires RW, et al. Cardiac rehabilitation is associated with reduced long-term mortality in patients undergoing combined heart valve and CABG surgery. *European journal of preventive cardiology* 2015;22(2):159-68.
243. de Vries H, Kemps HM, van Engen-Verheul MM, Kraaijenhagen RA, Peek N. Cardiac rehabilitation and survival in a large representative community cohort of Dutch patients. *European heart journal* 2015; 36:1519-28.
244. Meurs M, Burger H, van Riezen J, Slaets JP, Rosmalen JG, van Melle JP, et al. The association between cardiac rehabilitation and mortality risk for myocardial infarction patients with and without depressive symptoms. *J Affect Disord* 2015;188:278-83.
245. Schlitt A, Wischmann P, Wienke A, Hoepfner F, Noack F, Silber RE, et al. Rehabilitation in patients with coronary heart disease. *Dtsch Arztebl Int* 2015;112:527-34.
246. Stroup DF, Berlin JA, Morton SC, Olkin I, Williamson GD, Rennie D, et al. Meta-analysis of Observational Studies in Epidemiology - A Proposal of Reporting. *JAMA , Journal of the American Medical Association* 2000;283(15):2008-12.

247. Liberati A, Altman DG, J. T, Mulrow C, P.C. G, Ioannidis JPA, et al. The PRISMA Statement for Reporting Systematic Reviews and Meta-Analyses of Studies That Evaluate Health Care Interventions: Explanation and Elaboration. *PLoS medicine* 2009;6(7):1 - 27; e1000100; doi:10.1371/journal.pmed.
